# Supplementary material
Source: PubMed Central journal article supplement (PMC7391796)
Supplement: NIHMS1610946-supplement-supporting_information.pdf [file NIHMS1610946-supplement-supporting_information.pdf]

# Supporting Information

## **Benchmarking the performance of time-dependent density functional theory methods on biochromophores**

Yihan Shao,<sup>\*,†</sup> Ye Mei,<sup>‡</sup> Dage Sundholm,<sup>\*,¶</sup> and Ville R. I. Kaila<sup>\*,§</sup>

<sup>†</sup>*Department of Chemistry and Biochemistry, University of Oklahoma, Norman, Oklahoma 73019, USA; Q-Chem Inc., 6601 Owens Drive, Suite 105, Pleasanton, CA 94588, USA.*

<sup>‡</sup>*State Key Laboratory of Precision Spectroscopy, Institute of Theoretical and Computational Science, East China Normal University, Shanghai 200062, China; NYU-ECNU Center for Computational Chemistry at NYU Shanghai, Shanghai, China 200062; Q-Chem Inc., 6601 Owens Drive, Suite 105, Pleasanton, CA 94588, USA.*

<sup>¶</sup>*Department of Chemistry, Faculty of Science, P.O. Box 55, FIN-00014 University of Helsinki, Finland.*

<sup>§</sup>*Department Chemie, Technische Universität München (TUM), Lichtenbergstrasse 4, D-85747 Garching, Germany.*

E-mail: yihan.shao@ou.edu; dage.sundholm@helsinki.fi; ville.kaila@ch.tum.de

**Table S1:** VEEs (in eV) for the lowest excited state obtained at the CC2/def2-TZVP level of theory with B3LYP/def2-SVP and MP2/def2-TZVP optimized structures.

| Molecule                          | CC2//B3LYP | CC2//MP2 |
|-----------------------------------|------------|----------|
| pVP                               | 4.62       | 4.66     |
| pCA                               | 4.47       | 4.52     |
| pCA <sup>-</sup>                  | 3.23       | 3.24     |
| pCA' <sup>-</sup>                 | 3.35       | 3.28     |
| TMpCA <sup>-</sup>                | 3.04       | 3.04     |
| pCT <sup>-</sup>                  | 3.04       | 3.04     |
| pHBDI <sup>-</sup>                | 2.91       | 2.92     |
| pHBDI                             | 3.67       | 3.71     |
| pHBDI <sup>+</sup>                | 3.09       | 3.15     |
| PSBT <sup>+</sup>                 | 2.11       | 2.17     |
| PSB11Me <sub>2</sub> <sup>+</sup> | 2.10       | 2.17     |

**Table S2: TDDFT and CC2 excitation energies (E, in eV) and oscillator strengths (f) for pVP with the def2-TZVP and aug-def2-TZVP basis sets.**

| molecule        |   | def2-TZVP |      |      |      |      | aug-def2-TZVP |      |      |      |      |
|-----------------|---|-----------|------|------|------|------|---------------|------|------|------|------|
|                 |   | 1a        | 2a   | 3a   | 4a   | 5a   | 1a            | 2a   | 3a   | 4a   | 5a   |
| RPA             | E | 5.04      | 5.38 | 6.68 | 7.07 | 7.11 | 4.93          | 5.30 | 5.56 | 5.88 | 6.06 |
|                 | f | 0.31      | 0.08 | 0.59 | 0.47 | 0.00 | 0.29          | 0.08 | 0.01 | 0.00 | 0.00 |
| B3LYP           | E | 4.48      | 4.80 | 5.60 | 5.76 | 6.16 | 4.41          | 4.72 | 4.76 | 5.16 | 5.37 |
|                 | f | 0.12      | 0.34 | 0.00 | 0.17 | 0.05 | 0.15          | 0.28 | 0.00 | 0.01 | 0.00 |
| BHLYP           | E | 4.83      | 5.12 | 6.29 | 6.39 | 6.58 | 4.74          | 5.04 | 5.32 | 5.64 | 5.87 |
|                 | f | 0.20      | 0.28 | 0.00 | 0.24 | 0.50 | 0.21          | 0.23 | 0.00 | 0.01 | 0.00 |
| CAM-B3LYP       | E | 4.71      | 5.03 | 6.18 | 6.27 | 6.54 | 4.64          | 4.95 | 5.26 | 5.61 | 5.85 |
|                 | f | 0.13      | 0.36 | 0.00 | 0.23 | 0.44 | 0.15          | 0.30 | 0.00 | 0.01 | 0.00 |
| CAMh-B3LYP      | E | 4.64      | 4.96 | 6.00 | 6.12 | 6.49 | 4.57          | 4.88 | 5.09 | 5.45 | 5.67 |
|                 | f | 0.13      | 0.35 | 0.00 | 0.22 | 0.42 | 0.15          | 0.30 | 0.00 | 0.01 | 0.00 |
| BP86            | E | 4.17      | 4.51 | 5.25 | 5.40 | 5.49 | 4.13          | 4.46 | 4.62 | 5.06 | 5.22 |
|                 | f | 0.08      | 0.34 | 0.09 | 0.00 | 0.09 | 0.09          | 0.32 | 0.00 | 0.01 | 0.10 |
| PBE             | E | 4.18      | 4.52 | 5.20 | 5.26 | 5.48 | 4.11          | 4.45 | 4.45 | 4.91 | 5.11 |
|                 | f | 0.08      | 0.33 | 0.00 | 0.09 | 0.09 | 0.10          | 0.31 | 0.00 | 0.00 | 0.00 |
| PBE0            | E | 4.58      | 4.90 | 5.92 | 5.95 | 6.37 | 4.51          | 4.82 | 5.05 | 5.42 | 5.62 |
|                 | f | 0.13      | 0.35 | 0.19 | 0.00 | 0.08 | 0.15          | 0.30 | 0.00 | 0.01 | 0.00 |
| PBE50           | E | 4.87      | 5.16 | 6.43 | 6.61 | 6.65 | 4.79          | 5.10 | 5.58 | 5.89 | 6.11 |
|                 | f | 0.20      | 0.30 | 0.24 | 0.00 | 0.48 | 0.21          | 0.25 | 0.00 | 0.01 | 0.00 |
| $\omega$ PBE    | E | 4.75      | 5.10 | 6.38 | 6.63 | 6.68 | 4.69          | 5.03 | 5.63 | 5.99 | 6.22 |
|                 | f | 0.09      | 0.43 | 0.24 | 0.43 | 0.00 | 0.10          | 0.38 | 0.00 | 0.01 | 0.00 |
| $\omega$ hPBE0  | E | 4.66      | 4.97 | 6.08 | 6.19 | 6.52 | 4.59          | 4.90 | 5.22 | 5.56 | 5.76 |
|                 | f | 0.13      | 0.36 | 0.21 | 0.00 | 0.40 | 0.15          | 0.31 | 0.00 | 0.01 | 0.00 |
| $\omega$ PBEh   | E | 4.74      | 5.06 | 6.27 | 6.50 | 6.59 | 4.67          | 4.98 | 5.42 | 5.75 | 5.95 |
|                 | f | 0.11      | 0.39 | 0.23 | 0.00 | 0.42 | 0.13          | 0.34 | 0.00 | 0.01 | 0.00 |
| BNL             | E | 4.91      | 5.23 | 6.66 | 6.69 | 6.75 | 4.82          | 5.15 | 5.64 | 6.02 | 6.29 |
|                 | f | 0.14      | 0.36 | 0.00 | 0.18 | 0.64 | 0.15          | 0.31 | 0.00 | 0.01 | 0.00 |
| $\omega$ B97X   | E | 4.82      | 5.13 | 6.49 | 6.62 | 6.87 | 4.76          | 5.08 | 5.87 | 6.21 | 6.49 |
|                 | f | 0.12      | 0.37 | 0.21 | 0.54 | 0.00 | 0.13          | 0.33 | 0.00 | 0.01 | 0.00 |
| $\omega$ B97X-D | E | 4.74      | 5.05 | 6.29 | 6.56 | 6.70 | 4.68          | 4.99 | 5.55 | 5.86 | 6.07 |
|                 | f | 0.12      | 0.38 | 0.23 | 0.44 | 0.00 | 0.14          | 0.32 | 0.00 | 0.01 | 0.00 |
| M06-2X          | E | 4.78      | 5.11 | 6.28 | 6.31 | 6.66 | 4.70          | 5.03 | 5.19 | 5.54 | 5.73 |
|                 | f | 0.14      | 0.38 | 0.00 | 0.25 | 0.39 | 0.15          | 0.32 | 0.00 | 0.01 | 0.00 |
| M11             | E | 4.87      | 5.17 | 6.47 | 6.50 | 6.66 | 4.77          | 4.96 | 5.08 | 5.30 | 5.45 |
|                 | f | 0.15      | 0.37 | 0.25 | 0.00 | 0.45 | 0.17          | 0.00 | 0.29 | 0.00 | 0.00 |
| M11-L           | E | 4.33      | 4.62 | 5.02 | 5.41 | 5.73 | 3.50          | 3.93 | 4.03 | 4.24 | 4.34 |
|                 | f | 0.14      | 0.27 | 0.00 | 0.11 | 0.05 | 0.00          | 0.00 | 0.00 | 0.15 | 0.00 |
| CC2             | E | 4.66      | 5.25 | 6.42 | 6.44 | 6.84 | 4.58          | 5.11 | 5.22 | 5.60 | 5.80 |
|                 | f | 0.05      | 0.52 | 0.00 | 0.28 | 0.45 | 0.05          | 0.52 | 0.00 | 0.28 | 0.45 |

**Table S3: TDDFT and CC2 excitation energies (E, in eV) and oscillator strengths (f) for pCA with the def2-TZVP and aug-def2-TZVP basis sets.**

| molecule        |   | def2-TZVP |      |      |      |      | aug-def2-TZVP |      |      |      |      |
|-----------------|---|-----------|------|------|------|------|---------------|------|------|------|------|
|                 |   | 1a        | 2a   | 3a   | 4a   | 5a   | 1a            | 2a   | 3a   | 4a   | 5a   |
| RPA             | E | 4.73      | 5.40 | 6.37 | 6.44 | 6.84 | 4.68          | 5.34 | 5.90 | 6.29 | 6.36 |
|                 | f | 0.63      | 0.02 | 0.00 | 0.42 | 0.41 | 0.61          | 0.02 | 0.00 | 0.00 | 0.02 |
| B3LYP           | E | 4.13      | 4.48 | 4.53 | 5.26 | 5.67 | 4.09          | 4.46 | 4.50 | 5.00 | 5.20 |
|                 | f | 0.65      | 0.00 | 0.03 | 0.12 | 0.07 | 0.64          | 0.00 | 0.04 | 0.00 | 0.13 |
| BHLYP           | E | 4.46      | 4.98 | 5.34 | 5.99 | 6.32 | 4.42          | 4.94 | 5.32 | 5.59 | 5.94 |
|                 | f | 0.69      | 0.04 | 0.00 | 0.22 | 0.24 | 0.67          | 0.04 | 0.00 | 0.00 | 0.25 |
| CAM-B3LYP       | E | 4.39      | 4.83 | 4.99 | 5.89 | 6.25 | 4.34          | 4.79 | 4.97 | 5.49 | 5.83 |
|                 | f | 0.67      | 0.05 | 0.00 | 0.21 | 0.19 | 0.66          | 0.06 | 0.00 | 0.00 | 0.23 |
| CAMh-B3LYP      | E | 4.31      | 4.74 | 4.84 | 5.70 | 6.15 | 4.26          | 4.71 | 4.82 | 5.33 | 5.64 |
|                 | f | 0.67      | 0.05 | 0.00 | 0.18 | 0.15 | 0.65          | 0.05 | 0.00 | 0.00 | 0.20 |
| BP86            | E | 3.69      | 3.84 | 4.15 | 4.64 | 4.69 | 3.68          | 3.81 | 4.13 | 4.63 | 4.66 |
|                 | f | 0.00      | 0.57 | 0.02 | 0.00 | 0.07 | 0.00          | 0.57 | 0.02 | 0.00 | 0.07 |
| PBE             | E | 3.66      | 3.84 | 4.16 | 4.61 | 4.69 | 3.66          | 3.80 | 4.13 | 4.60 | 4.65 |
|                 | f | 0.00      | 0.57 | 0.02 | 0.00 | 0.07 | 0.00          | 0.57 | 0.02 | 0.00 | 0.07 |
| PBE0            | E | 4.22      | 4.60 | 4.65 | 5.42 | 5.86 | 4.18          | 4.58 | 4.62 | 5.30 | 5.37 |
|                 | f | 0.67      | 0.00 | 0.03 | 0.14 | 0.07 | 0.65          | 0.00 | 0.04 | 0.00 | 0.15 |
| PBE50           | E | 4.50      | 5.01 | 5.30 | 6.03 | 6.39 | 4.46          | 4.98 | 5.28 | 5.85 | 5.97 |
|                 | f | 0.71      | 0.04 | 0.00 | 0.22 | 0.22 | 0.69          | 0.04 | 0.00 | 0.00 | 0.23 |
| $\omega$ PBE    | E | 4.47      | 4.84 | 4.87 | 6.07 | 6.33 | 4.43          | 4.81 | 4.84 | 5.84 | 6.01 |
|                 | f | 0.67      | 0.07 | 0.00 | 0.23 | 0.15 | 0.66          | 0.08 | 0.00 | 0.00 | 0.26 |
| $\omega$ hPBE0  | E | 4.31      | 4.74 | 4.75 | 5.62 | 6.11 | 4.27          | 4.71 | 4.73 | 5.46 | 5.58 |
|                 | f | 0.68      | 0.04 | 0.00 | 0.17 | 0.10 | 0.67          | 0.04 | 0.00 | 0.00 | 0.17 |
| $\omega$ PBEh   | E | 4.42      | 4.83 | 4.89 | 5.90 | 6.28 | 4.38          | 4.80 | 4.86 | 5.66 | 5.85 |
|                 | f | 0.68      | 0.06 | 0.00 | 0.20 | 0.16 | 0.67          | 0.06 | 0.00 | 0.00 | 0.23 |
| BNL             | E | 4.62      | 5.06 | 5.33 | 6.46 | 6.48 | 4.57          | 5.02 | 5.29 | 5.85 | 6.31 |
|                 | f | 0.66      | 0.08 | 0.00 | 0.13 | 0.41 | 0.64          | 0.09 | 0.00 | 0.00 | 0.00 |
| $\omega$ B97X   | E | 4.52      | 4.94 | 5.15 | 6.20 | 6.34 | 4.48          | 4.91 | 5.12 | 6.10 | 6.13 |
|                 | f | 0.67      | 0.07 | 0.00 | 0.25 | 0.21 | 0.66          | 0.07 | 0.00 | 0.00 | 0.27 |
| $\omega$ B97X-D | E | 4.43      | 4.85 | 4.95 | 5.92 | 6.28 | 4.38          | 4.82 | 4.93 | 5.80 | 5.87 |
|                 | f | 0.68      | 0.05 | 0.00 | 0.21 | 0.17 | 0.67          | 0.06 | 0.00 | 0.00 | 0.22 |
| M06-2X          | E | 4.43      | 4.89 | 4.97 | 5.92 | 6.36 | 4.39          | 4.86 | 4.95 | 5.43 | 5.86 |
|                 | f | 0.68      | 0.05 | 0.00 | 0.21 | 0.15 | 0.66          | 0.06 | 0.00 | 0.00 | 0.20 |
| M11             | E | 4.53      | 5.00 | 5.01 | 6.17 | 6.40 | 4.47          | 4.96 | 4.99 | 5.21 | 5.62 |
|                 | f | 0.70      | 0.05 | 0.00 | 0.25 | 0.16 | 0.66          | 0.06 | 0.00 | 0.00 | 0.00 |
| M11-L           | E | 4.02      | 4.20 | 4.37 | 4.90 | 5.18 | 3.75          | 3.99 | 4.16 | 4.19 | 4.34 |
|                 | f | 0.58      | 0.00 | 0.02 | 0.09 | 0.00 | 0.00          | 0.56 | 0.00 | 0.00 | 0.03 |
| CC2             | E | 4.52      | 4.77 | 4.96 | 6.02 | 6.43 | 4.44          | 4.72 | 4.90 | 5.45 | 5.88 |
|                 | f | 0.54      | 0.27 | 0.00 | 0.22 | 0.16 | 0.54          | 0.27 | 0.00 | 0.22 | 0.16 |

Table S4: TDDFT and CC2 excitation energies (E, in eV) and oscillator strengths (f) for pCA<sup>-</sup> with the def2-TZVP and aug-def2-TZVP basis sets.

| molecule        |   | def2-TZVP |      |      |      |      | aug-def2-TZVP |      |      |      |      |
|-----------------|---|-----------|------|------|------|------|---------------|------|------|------|------|
|                 |   | 1a        | 2a   | 3a   | 4a   | 5a   | 1a            | 2a   | 3a   | 4a   | 5a   |
| RPA             | E | 3.93      | 4.94 | 5.61 | 6.47 | 6.51 | 3.68          | 3.84 | 3.87 | 4.08 | 4.36 |
|                 | f | 1.07      | 0.09 | 0.00 | 0.00 | 0.14 | 0.01          | 1.01 | 0.00 | 0.00 | 0.00 |
| B3LYP           | E | 3.40      | 3.43 | 4.19 | 4.69 | 4.69 | 3.05          | 3.36 | 3.38 | 3.41 | 3.45 |
|                 | f | 0.00      | 0.86 | 0.09 | 0.04 | 0.00 | 0.00          | 0.87 | 0.00 | 0.00 | 0.00 |
| BHLYP           | E | 3.62      | 4.41 | 4.55 | 5.45 | 5.66 | 3.54          | 3.58 | 3.77 | 3.85 | 4.24 |
|                 | f | 0.96      | 0.00 | 0.09 | 0.07 | 0.00 | 0.94          | 0.00 | 0.00 | 0.00 | 0.00 |
| CAM-B3LYP       | E | 3.51      | 4.12 | 4.40 | 5.30 | 5.47 | 3.42          | 3.57 | 3.76 | 3.83 | 4.12 |
|                 | f | 0.91      | 0.00 | 0.09 | 0.06 | 0.00 | 0.91          | 0.00 | 0.00 | 0.00 | 0.00 |
| CAMh-B3LYP      | E | 3.48      | 3.91 | 4.34 | 5.10 | 5.24 | 3.40          | 3.40 | 3.59 | 3.67 | 3.91 |
|                 | f | 0.89      | 0.00 | 0.09 | 0.05 | 0.00 | 0.01          | 0.88 | 0.00 | 0.00 | 0.00 |
| BP86            | E | 2.56      | 3.29 | 3.86 | 3.92 | 4.18 | 2.57          | 2.88 | 3.24 | 3.26 | 3.35 |
|                 | f | 0.00      | 0.73 | 0.00 | 0.09 | 0.02 | 0.00          | 0.00 | 0.71 | 0.07 | 0.00 |
| PBE             | E | 2.54      | 3.30 | 3.84 | 3.92 | 4.18 | 2.55          | 2.75 | 3.11 | 3.22 | 3.28 |
|                 | f | 0.00      | 0.73 | 0.00 | 0.09 | 0.00 | 0.00          | 0.00 | 0.00 | 0.00 | 0.83 |
| PBE0            | E | 3.48      | 3.54 | 4.29 | 4.85 | 4.95 | 3.29          | 3.42 | 3.54 | 3.57 | 3.64 |
|                 | f | 0.87      | 0.00 | 0.09 | 0.04 | 0.00 | 0.00          | 0.88 | 0.00 | 0.00 | 0.00 |
| PBE50           | E | 3.64      | 4.36 | 4.59 | 5.48 | 5.78 | 3.57          | 3.79 | 3.97 | 4.04 | 4.35 |
|                 | f | 0.97      | 0.00 | 0.09 | 0.07 | 0.00 | 0.95          | 0.00 | 0.00 | 0.00 | 0.00 |
| $\omega$ PBE    | E | 3.48      | 4.13 | 4.40 | 5.31 | 5.34 | 3.41          | 3.83 | 4.02 | 4.13 | 4.16 |
|                 | f | 0.92      | 0.00 | 0.08 | 0.00 | 0.00 | 0.93          | 0.00 | 0.00 | 0.00 | 0.00 |
| $\omega$ hPBE0  | E | 3.50      | 3.78 | 4.35 | 5.02 | 5.13 | 3.43          | 3.49 | 3.68 | 3.74 | 3.78 |
|                 | f | 0.89      | 0.00 | 0.09 | 0.05 | 0.00 | 0.89          | 0.00 | 0.00 | 0.00 | 0.00 |
| $\omega$ PBEh   | E | 3.51      | 4.08 | 4.40 | 5.28 | 5.30 | 3.44          | 3.65 | 3.82 | 3.96 | 4.08 |
|                 | f | 0.91      | 0.00 | 0.09 | 0.06 | 0.00 | 0.91          | 0.00 | 0.00 | 0.00 | 0.00 |
| BNL             | E | 3.58      | 4.55 | 4.57 | 5.80 | 6.14 | 3.49          | 3.85 | 4.09 | 4.26 | 4.49 |
|                 | f | 0.99      | 0.00 | 0.10 | 0.00 | 0.00 | 0.97          | 0.01 | 0.00 | 0.00 | 0.11 |
| $\omega$ B97X   | E | 3.54      | 4.41 | 4.48 | 5.63 | 5.75 | 3.47          | 4.08 | 4.30 | 4.41 | 4.46 |
|                 | f | 0.94      | 0.00 | 0.09 | 0.00 | 0.00 | 0.94          | 0.01 | 0.00 | 0.00 | 0.00 |
| $\omega$ B97X-D | E | 3.51      | 4.15 | 4.40 | 5.30 | 5.38 | 3.44          | 3.76 | 3.93 | 4.08 | 4.15 |
|                 | f | 0.91      | 0.00 | 0.09 | 0.06 | 0.00 | 0.91          | 0.00 | 0.00 | 0.00 | 0.00 |
| M06-2X          | E | 3.47      | 4.05 | 4.45 | 5.36 | 5.43 | 3.37          | 3.40 | 3.57 | 3.62 | 4.01 |
|                 | f | 0.92      | 0.00 | 0.09 | 0.06 | 0.00 | 0.00          | 0.90 | 0.00 | 0.00 | 0.00 |
| M11             | E | 3.51      | 4.23 | 4.51 | 5.48 | 5.62 | 3.06          | 3.24 | 3.39 | 3.43 | 3.71 |
|                 | f | 0.94      | 0.00 | 0.08 | 0.00 | 0.08 | 0.00          | 0.00 | 0.00 | 0.89 | 0.00 |
| M11-L           | E | 3.12      | 3.44 | 4.03 | 4.09 | 4.39 | 1.60          | 2.10 | 2.14 | 2.31 | 2.50 |
|                 | f | 0.00      | 0.73 | 0.00 | 0.09 | 0.03 | 0.00          | 0.00 | 0.00 | 0.00 | 0.00 |
| CC2             | E | 3.24      | 3.54 | 4.23 | 4.50 | 5.27 | 3.25          | 3.43 | 3.53 | 3.88 | 4.01 |
|                 | f | 1.01      | 0.00 | 0.10 | 0.00 | 0.05 | 1.01          | 0.00 | 0.10 | 0.00 | 0.05 |

**Table S5: TDDFT and CC2 excitation energies (E, in eV) and oscillator strengths (f) for pCA<sup>2-</sup> with the def2-TZVP and aug-def2-TZVP basis sets.**

| molecule        |   | def2-TZVP |      |      |      |      | aug-def2-TZVP |      |      |      |      |
|-----------------|---|-----------|------|------|------|------|---------------|------|------|------|------|
|                 |   | 1a        | 2a   | 3a   | 4a   | 5a   | 1a            | 2a   | 3a   | 4a   | 5a   |
| RPA             | E | 4.83      | 5.17 | 5.65 | 6.22 | 6.37 | 4.51          | 4.70 | 5.01 | 5.07 | 5.11 |
|                 | f | 0.34      | 0.19 | 0.00 | 0.00 | 0.00 | 0.00          | 0.30 | 0.00 | 0.16 | 0.00 |
| B3LYP           | E | 2.66      | 2.81 | 3.07 | 3.22 | 3.27 | 2.65          | 2.73 | 2.81 | 2.87 | 3.06 |
|                 | f | 0.00      | 0.00 | 0.00 | 0.00 | 0.00 | 0.00          | 0.00 | 0.00 | 0.00 | 0.00 |
| BHLYP           | E | 4.09      | 4.23 | 4.47 | 4.74 | 4.86 | 4.11          | 4.13 | 4.28 | 4.38 | 4.55 |
|                 | f | 0.00      | 0.00 | 0.12 | 0.03 | 0.49 | 0.00          | 0.00 | 0.00 | 0.13 | 0.00 |
| CAM-B3LYP       | E | 3.71      | 3.71 | 4.35 | 4.43 | 4.79 | 3.77          | 3.78 | 4.10 | 4.21 | 4.31 |
|                 | f | 0.00      | 0.00 | 0.09 | 0.00 | 0.58 | 0.00          | 0.00 | 0.00 | 0.00 | 0.09 |
| CAMh-B3LYP      | E | 3.38      | 3.44 | 4.06 | 4.24 | 4.27 | 3.45          | 3.50 | 3.70 | 3.83 | 3.87 |
|                 | f | 0.00      | 0.00 | 0.01 | 0.07 | 0.00 | 0.00          | 0.00 | 0.00 | 0.00 | 0.00 |
| BP86            | E | 1.46      | 1.66 | 1.74 | 1.95 | 2.18 | 1.55          | 1.57 | 1.76 | 1.81 | 1.82 |
|                 | f | 0.00      | 0.00 | 0.00 | 0.00 | 0.00 | 0.00          | 0.00 | 0.00 | 0.00 | 0.00 |
| PBE             | E | 1.43      | 1.62 | 1.70 | 1.91 | 2.16 | 1.39          | 1.52 | 1.64 | 1.73 | 1.78 |
|                 | f | 0.00      | 0.00 | 0.00 | 0.00 | 0.00 | 0.00          | 0.00 | 0.00 | 0.00 | 0.00 |
| PBE0            | E | 2.89      | 2.99 | 3.40 | 3.50 | 3.51 | 2.95          | 3.04 | 3.07 | 3.19 | 3.44 |
|                 | f | 0.00      | 0.00 | 0.00 | 0.00 | 0.00 | 0.00          | 0.00 | 0.00 | 0.00 | 0.00 |
| PBE50           | E | 4.03      | 4.19 | 4.51 | 4.73 | 4.89 | 4.06          | 4.23 | 4.35 | 4.45 | 4.68 |
|                 | f | 0.00      | 0.00 | 0.12 | 0.01 | 0.54 | 0.00          | 0.00 | 0.00 | 0.13 | 0.00 |
| $\omega$ PBE    | E | 3.66      | 3.71 | 4.44 | 4.58 | 4.86 | 3.72          | 3.78 | 4.39 | 4.48 | 4.54 |
|                 | f | 0.00      | 0.00 | 0.09 | 0.00 | 0.59 | 0.00          | 0.00 | 0.10 | 0.01 | 0.01 |
| $\omega$ hPBE0  | E | 3.23      | 3.28 | 3.90 | 4.02 | 4.08 | 3.29          | 3.33 | 3.64 | 3.75 | 3.94 |
|                 | f | 0.00      | 0.00 | 0.01 | 0.00 | 0.00 | 0.00          | 0.00 | 0.00 | 0.00 | 0.00 |
| $\omega$ PBEh   | E | 3.59      | 3.62 | 4.36 | 4.41 | 4.82 | 3.65          | 3.69 | 4.29 | 4.32 | 4.35 |
|                 | f | 0.00      | 0.00 | 0.07 | 0.02 | 0.63 | 0.00          | 0.00 | 0.00 | 0.10 | 0.00 |
| BNL             | E | 4.43      | 4.63 | 4.66 | 5.03 | 5.56 | 4.47          | 4.57 | 4.67 | 4.67 | 4.94 |
|                 | f | 0.00      | 0.00 | 0.13 | 0.49 | 0.05 | 0.00          | 0.14 | 0.00 | 0.00 | 0.42 |
| $\omega$ B97X   | E | 4.06      | 4.13 | 4.53 | 4.87 | 5.00 | 4.12          | 4.19 | 4.47 | 4.82 | 4.84 |
|                 | f | 0.00      | 0.00 | 0.11 | 0.35 | 0.20 | 0.00          | 0.00 | 0.13 | 0.41 | 0.00 |
| $\omega$ B97X-D | E | 3.70      | 3.72 | 4.38 | 4.49 | 4.80 | 3.75          | 3.78 | 4.33 | 4.43 | 4.53 |
|                 | f | 0.00      | 0.00 | 0.09 | 0.00 | 0.57 | 0.00          | 0.00 | 0.11 | 0.00 | 0.01 |
| M06-2X          | E | 3.79      | 3.98 | 4.42 | 4.55 | 4.86 | 3.83          | 3.99 | 4.03 | 4.26 | 4.34 |
|                 | f | 0.00      | 0.00 | 0.09 | 0.00 | 0.61 | 0.00          | 0.00 | 0.00 | 0.00 | 0.00 |
| M11             | E | 4.03      | 4.26 | 4.59 | 4.92 | 5.15 | 3.84          | 4.05 | 4.27 | 4.29 | 4.30 |
|                 | f | 0.00      | 0.00 | 0.13 | 0.47 | 0.09 | 0.00          | 0.00 | 0.00 | 0.00 | 0.01 |
| M11-L           | E | 2.09      | 2.28 | 2.30 | 2.48 | 2.50 | 0.65          | 0.83 | 1.17 | 1.38 | 1.53 |
|                 | f | 0.00      | 0.00 | 0.00 | 0.00 | 0.00 | 0.00          | 0.00 | 0.00 | 0.00 | 0.00 |
| CC2             | E | 3.28      | 3.43 | 4.17 | 4.34 | 4.41 | 3.27          | 3.33 | 3.41 | 3.50 | 3.60 |
|                 | f | 0.00      | 0.00 | 0.02 | 0.02 | 0.05 | 0.00          | 0.00 | 0.02 | 0.02 | 0.05 |

**Table S6:** TDDFT and CC2 excitation energies (E, in eV) and oscillator strengths (f) for TMpCA<sup>-</sup> with the def2-TZVP and aug-def2-TZVP basis sets.

| molecule        |   | def2-TZVP |      |      |      |      | aug-def2-TZVP |      |      |      |      |
|-----------------|---|-----------|------|------|------|------|---------------|------|------|------|------|
|                 |   | 1a        | 2a   | 3a   | 4a   | 5a   | 1a            | 2a   | 3a   | 4a   | 5a   |
| RPA             | E | 3.76      | 4.96 | 5.53 | 5.64 | 5.85 | 3.68          | 3.76 | 3.95 | 4.17 | 4.38 |
|                 | f | 1.30      | 0.08 | 0.00 | 0.00 | 0.00 | 1.26          | 0.00 | 0.00 | 0.00 | 0.00 |
| B3LYP           | E | 3.28      | 3.29 | 4.04 | 4.19 | 4.22 | 2.97          | 3.22 | 3.30 | 3.41 | 3.49 |
|                 | f | 1.10      | 0.00 | 0.00 | 0.08 | 0.00 | 0.00          | 1.10 | 0.00 | 0.00 | 0.00 |
| BHLYP           | E | 3.45      | 4.31 | 4.57 | 4.83 | 4.93 | 3.38          | 3.64 | 3.77 | 3.88 | 4.23 |
|                 | f | 1.17      | 0.00 | 0.08 | 0.00 | 0.00 | 1.15          | 0.00 | 0.00 | 0.00 | 0.00 |
| CAM-B3LYP       | E | 3.34      | 4.02 | 4.43 | 4.59 | 4.89 | 3.27          | 3.67 | 3.79 | 3.86 | 4.03 |
|                 | f | 1.11      | 0.00 | 0.09 | 0.00 | 0.00 | 1.11          | 0.00 | 0.00 | 0.00 | 0.00 |
| CAMh-B3LYP      | E | 3.32      | 3.80 | 4.36 | 4.48 | 4.63 | 3.25          | 3.45 | 3.59 | 3.71 | 3.81 |
|                 | f | 1.09      | 0.00 | 0.09 | 0.00 | 0.00 | 1.10          | 0.00 | 0.00 | 0.00 | 0.00 |
| BP86            | E | 2.43      | 3.14 | 3.53 | 3.70 | 3.87 | 2.45          | 2.74 | 3.12 | 3.13 | 3.38 |
|                 | f | 0.00      | 0.95 | 0.00 | 0.00 | 0.00 | 0.00          | 0.00 | 0.00 | 1.00 | 0.00 |
| PBE             | E | 2.41      | 3.15 | 3.47 | 3.68 | 3.79 | 2.43          | 2.62 | 2.98 | 3.12 | 3.24 |
|                 | f | 0.00      | 0.95 | 0.00 | 0.00 | 0.00 | 0.00          | 0.00 | 0.00 | 1.00 | 0.00 |
| PBE0            | E | 3.31      | 3.42 | 4.29 | 4.30 | 4.31 | 3.24          | 3.26 | 3.43 | 3.61 | 3.69 |
|                 | f | 1.07      | 0.00 | 0.08 | 0.00 | 0.00 | 0.00          | 1.10 | 0.00 | 0.00 | 0.00 |
| PBE50           | E | 3.46      | 4.25 | 4.61 | 4.80 | 5.06 | 3.40          | 3.85 | 3.98 | 4.08 | 4.25 |
|                 | f | 1.18      | 0.00 | 0.08 | 0.00 | 0.00 | 1.17          | 0.00 | 0.00 | 0.00 | 0.00 |
| $\omega$ PBE    | E | 3.30      | 4.03 | 4.42 | 4.51 | 5.27 | 3.24          | 3.94 | 4.04 | 4.11 | 4.26 |
|                 | f | 1.12      | 0.00 | 0.07 | 0.00 | 0.00 | 1.12          | 0.00 | 0.00 | 0.00 | 0.00 |
| $\omega$ hPBE0  | E | 3.33      | 3.67 | 4.36 | 4.43 | 4.64 | 3.27          | 3.53 | 3.68 | 3.70 | 3.79 |
|                 | f | 1.09      | 0.00 | 0.08 | 0.00 | 0.00 | 1.10          | 0.00 | 0.00 | 0.00 | 0.00 |
| $\omega$ PBEh   | E | 3.33      | 3.98 | 4.42 | 4.54 | 5.10 | 3.27          | 3.76 | 3.91 | 3.98 | 4.03 |
|                 | f | 1.11      | 0.00 | 0.08 | 0.00 | 0.00 | 1.11          | 0.00 | 0.00 | 0.00 | 0.00 |
| BNL             | E | 3.41      | 4.46 | 4.60 | 4.78 | 5.43 | 3.33          | 3.93 | 4.16 | 4.34 | 4.45 |
|                 | f | 1.19      | 0.00 | 0.09 | 0.00 | 0.00 | 1.17          | 0.00 | 0.00 | 0.00 | 0.00 |
| $\omega$ B97X   | E | 3.37      | 4.31 | 4.50 | 4.72 | 5.34 | 3.31          | 4.18 | 4.32 | 4.38 | 4.53 |
|                 | f | 1.14      | 0.00 | 0.08 | 0.00 | 0.00 | 1.14          | 0.00 | 0.00 | 0.00 | 0.00 |
| $\omega$ B97X-D | E | 3.34      | 4.05 | 4.43 | 4.59 | 5.12 | 3.28          | 3.87 | 4.02 | 4.06 | 4.15 |
|                 | f | 1.11      | 0.00 | 0.08 | 0.00 | 0.00 | 1.11          | 0.00 | 0.00 | 0.00 | 0.00 |
| M06-2X          | E | 3.30      | 3.95 | 4.45 | 4.46 | 4.83 | 3.24          | 3.43 | 3.56 | 3.65 | 3.95 |
|                 | f | 1.12      | 0.00 | 0.00 | 0.09 | 0.00 | 1.11          | 0.00 | 0.00 | 0.00 | 0.00 |
| M11             | E | 3.32      | 4.13 | 4.47 | 4.53 | 5.21 | 3.15          | 3.26 | 3.32 | 3.48 | 3.74 |
|                 | f | 1.13      | 0.00 | 0.00 | 0.08 | 0.00 | 0.00          | 1.10 | 0.00 | 0.00 | 0.00 |
| M11-L           | E | 2.97      | 3.26 | 3.41 | 4.06 | 4.13 | 1.49          | 2.10 | 2.17 | 2.22 | 2.25 |
|                 | f | 0.00      | 0.97 | 0.00 | 0.06 | 0.00 | 0.00          | 0.00 | 0.00 | 0.00 | 0.00 |
| CC2             | E | 3.04      | 3.40 | 4.23 | 4.44 | 4.92 | 2.96          | 3.30 | 3.45 | 3.47 | 3.84 |
|                 | f | 1.21      | 0.00 | 0.09 | 0.00 | 0.00 | 1.21          | 0.00 | 0.09 | 0.00 | 0.00 |

**Table S7: TDDFT and CC2 excitation energies (E, in eV) and oscillator strengths (f) for pCT<sup>-</sup> with the def2-TZVP and aug-def2-TZVP basis sets.**

| molecule        |   | def2-TZVP |      |      |      |      | aug-def2-TZVP |      |      |      |      |
|-----------------|---|-----------|------|------|------|------|---------------|------|------|------|------|
|                 |   | 1a        | 2a   | 3a   | 4a   | 5a   | 1a            | 2a   | 3a   | 4a   | 5a   |
| RPA             | E | 3.73      | 4.98 | 5.41 | 5.47 | 5.62 | 3.68          | 3.83 | 4.04 | 4.30 | 4.45 |
|                 | f | 1.47      | 0.07 | 0.08 | 0.00 | 0.00 | 1.41          | 0.01 | 0.00 | 0.00 | 0.00 |
| B3LYP           | E | 2.95      | 3.18 | 3.24 | 3.28 | 4.19 | 2.92          | 2.98 | 3.14 | 3.23 | 3.26 |
|                 | f | 0.19      | 0.05 | 0.00 | 0.94 | 0.00 | 0.18          | 0.00 | 0.05 | 0.96 | 0.00 |
| BHLYP           | E | 3.42      | 4.12 | 4.26 | 4.48 | 4.60 | 3.38          | 3.72 | 3.84 | 3.98 | 4.03 |
|                 | f | 1.34      | 0.00 | 0.00 | 0.00 | 0.07 | 1.32          | 0.00 | 0.00 | 0.00 | 0.00 |
| CAM-B3LYP       | E | 3.31      | 3.97 | 4.15 | 4.46 | 4.54 | 3.26          | 3.77 | 3.91 | 3.96 | 3.98 |
|                 | f | 1.28      | 0.00 | 0.01 | 0.06 | 0.00 | 1.26          | 0.00 | 0.00 | 0.00 | 0.00 |
| CAMh-B3LYP      | E | 3.28      | 3.75 | 3.78 | 4.09 | 4.39 | 3.23          | 3.55 | 3.67 | 3.72 | 3.77 |
|                 | f | 1.25      | 0.00 | 0.00 | 0.00 | 0.07 | 1.25          | 0.00 | 0.00 | 0.00 | 0.00 |
| BP86            | E | 2.26      | 2.36 | 2.38 | 2.60 | 2.68 | 2.26          | 2.37 | 2.38 | 2.62 | 2.70 |
|                 | f | 0.05      | 0.00 | 0.00 | 0.00 | 0.00 | 0.05          | 0.00 | 0.00 | 0.00 | 0.00 |
| PBE             | E | 2.25      | 2.33 | 2.37 | 2.56 | 2.65 | 2.24          | 2.35 | 2.36 | 2.59 | 2.59 |
|                 | f | 0.05      | 0.00 | 0.00 | 0.00 | 0.00 | 0.05          | 0.00 | 0.00 | 0.00 | 0.00 |
| PBE0            | E | 3.12      | 3.34 | 3.37 | 3.42 | 4.28 | 3.10          | 3.26 | 3.29 | 3.38 | 3.39 |
|                 | f | 0.41      | 0.75 | 0.00 | 0.06 | 0.00 | 0.41          | 0.02 | 0.76 | 0.03 | 0.00 |
| PBE50           | E | 3.43      | 4.14 | 4.20 | 4.51 | 4.65 | 3.40          | 3.94 | 4.04 | 4.08 | 4.19 |
|                 | f | 1.34      | 0.00 | 0.00 | 0.00 | 0.07 | 1.34          | 0.00 | 0.00 | 0.00 | 0.00 |
| $\omega$ PBE    | E | 3.27      | 3.97 | 4.46 | 4.55 | 4.65 | 3.23          | 3.98 | 4.04 | 4.23 | 4.41 |
|                 | f | 1.27      | 0.00 | 0.07 | 0.00 | 0.02 | 1.26          | 0.00 | 0.00 | 0.00 | 0.06 |
| $\omega$ hPBE0  | E | 3.29      | 3.62 | 3.67 | 3.95 | 4.40 | 3.25          | 3.61 | 3.64 | 3.64 | 3.78 |
|                 | f | 1.23      | 0.00 | 0.02 | 0.00 | 0.07 | 1.23          | 0.01 | 0.00 | 0.00 | 0.00 |
| $\omega$ PBEh   | E | 3.31      | 3.92 | 4.38 | 4.48 | 4.56 | 3.26          | 3.86 | 3.93 | 4.04 | 4.23 |
|                 | f | 1.27      | 0.00 | 0.04 | 0.04 | 0.00 | 1.26          | 0.00 | 0.00 | 0.00 | 0.01 |
| BNL             | E | 3.39      | 4.40 | 4.63 | 4.80 | 5.09 | 3.34          | 4.03 | 4.27 | 4.41 | 4.50 |
|                 | f | 1.35      | 0.00 | 0.08 | 0.00 | 0.07 | 1.34          | 0.00 | 0.00 | 0.00 | 0.02 |
| $\omega$ B97X   | E | 3.34      | 4.26 | 4.53 | 4.75 | 4.83 | 3.29          | 4.26 | 4.27 | 4.45 | 4.50 |
|                 | f | 1.30      | 0.00 | 0.07 | 0.00 | 0.03 | 1.29          | 0.00 | 0.00 | 0.08 | 0.00 |
| $\omega$ B97X-D | E | 3.31      | 3.99 | 4.42 | 4.50 | 4.61 | 3.27          | 3.96 | 4.00 | 4.14 | 4.32 |
|                 | f | 1.28      | 0.00 | 0.05 | 0.03 | 0.00 | 1.26          | 0.00 | 0.00 | 0.00 | 0.03 |
| M06-2X          | E | 3.27      | 3.89 | 4.02 | 4.39 | 4.43 | 3.23          | 3.54 | 3.65 | 3.76 | 3.88 |
|                 | f | 1.28      | 0.00 | 0.00 | 0.00 | 0.00 | 1.26          | 0.00 | 0.00 | 0.00 | 0.00 |
| M11             | E | 3.29      | 4.07 | 4.47 | 4.56 | 4.77 | 3.25          | 3.26 | 3.43 | 3.68 | 3.85 |
|                 | f | 1.29      | 0.00 | 0.00 | 0.07 | 0.04 | 1.20          | 0.05 | 0.01 | 0.00 | 0.00 |
| M11-L           | E | 2.45      | 2.56 | 2.90 | 3.16 | 3.24 | 1.47          | 1.86 | 2.11 | 2.18 | 2.35 |
|                 | f | 0.05      | 0.00 | 0.00 | 0.01 | 1.01 | 0.00          | 0.00 | 0.00 | 0.00 | 0.01 |
| CC2             | E | 3.04      | 3.36 | 3.89 | 4.26 | 4.40 | 2.98          | 3.33 | 3.37 | 3.55 | 3.57 |
|                 | f | 1.37      | 0.00 | 0.00 | 0.08 | 0.00 | 1.37          | 0.00 | 0.00 | 0.08 | 0.00 |



**Table S8: TDDFT and CC2 excitation energies (E, in eV) and oscillator strengths (f) for p-HBDI<sup>-</sup> with the def2-TZVP and aug-def2-TZVP basis sets.**

| molecule        |   | def2-TZVP |      |      |      |      | aug-def2-TZVP |      |      |      |      |
|-----------------|---|-----------|------|------|------|------|---------------|------|------|------|------|
|                 |   | 1a        | 2a   | 3a   | 4a   | 5a   | 1a            | 2a   | 3a   | 4a   | 5a   |
| RPA             | E | 3.56      | 5.01 | 5.46 | 5.63 | 5.90 | 3.35          | 3.48 | 3.59 | 3.73 | 3.85 |
|                 | f | 1.34      | 0.05 | 0.00 | 0.00 | 0.07 | 0.00          | 1.25 | 0.00 | 0.00 | 0.01 |
| B3LYP           | E | 3.10      | 3.20 | 3.73 | 4.16 | 4.18 | 2.46          | 3.00 | 3.01 | 3.19 | 3.28 |
|                 | f | 1.00      | 0.00 | 0.00 | 0.00 | 0.05 | 0.00          | 0.00 | 0.87 | 0.10 | 0.00 |
| BHLYP           | E | 3.25      | 4.22 | 4.54 | 4.60 | 5.03 | 3.03          | 3.20 | 3.53 | 3.62 | 3.67 |
|                 | f | 1.10      | 0.00 | 0.00 | 0.06 | 0.01 | 0.00          | 1.09 | 0.00 | 0.00 | 0.01 |
| CAM-B3LYP       | E | 3.15      | 3.92 | 4.47 | 4.62 | 4.71 | 3.09          | 3.12 | 3.60 | 3.60 | 3.74 |
|                 | f | 1.05      | 0.00 | 0.05 | 0.00 | 0.00 | 1.05          | 0.00 | 0.00 | 0.00 | 0.00 |
| CAMh-B3LYP      | E | 3.13      | 3.70 | 4.32 | 4.39 | 4.53 | 2.88          | 3.07 | 3.38 | 3.49 | 3.53 |
|                 | f | 1.02      | 0.00 | 0.00 | 0.05 | 0.00 | 0.00          | 1.02 | 0.00 | 0.00 | 0.01 |
| BP86            | E | 2.37      | 2.97 | 3.43 | 3.50 | 3.70 | 2.33          | 2.39 | 2.82 | 2.86 | 2.94 |
|                 | f | 0.00      | 0.85 | 0.00 | 0.00 | 0.00 | 0.00          | 0.00 | 0.00 | 0.00 | 0.73 |
| PBE             | E | 2.34      | 2.97 | 3.29 | 3.41 | 3.71 | 2.17          | 2.37 | 2.63 | 2.76 | 2.91 |
|                 | f | 0.00      | 0.85 | 0.00 | 0.00 | 0.00 | 0.00          | 0.00 | 0.00 | 0.00 | 0.27 |
| PBE0            | E | 3.13      | 3.33 | 4.06 | 4.28 | 4.29 | 2.71          | 3.07 | 3.24 | 3.41 | 3.47 |
|                 | f | 1.00      | 0.00 | 0.00 | 0.00 | 0.05 | 0.00          | 0.97 | 0.00 | 0.02 | 0.00 |
| PBE50           | E | 3.27      | 4.15 | 4.63 | 4.84 | 5.03 | 3.22          | 3.25 | 3.73 | 3.81 | 3.87 |
|                 | f | 1.11      | 0.00 | 0.05 | 0.00 | 0.01 | 1.10          | 0.00 | 0.00 | 0.00 | 0.00 |
| $\omega$ PBE    | E | 3.10      | 3.92 | 4.49 | 4.57 | 4.94 | 3.05          | 3.59 | 3.87 | 3.97 | 4.12 |
|                 | f | 1.06      | 0.00 | 0.05 | 0.00 | 0.01 | 1.06          | 0.00 | 0.00 | 0.00 | 0.00 |
| $\omega$ hPBE0  | E | 3.14      | 3.57 | 4.39 | 4.43 | 4.45 | 2.96          | 3.09 | 3.45 | 3.56 | 3.60 |
|                 | f | 1.02      | 0.00 | 0.05 | 0.00 | 0.00 | 0.00          | 1.01 | 0.00 | 0.00 | 0.01 |
| $\omega$ PBEh   | E | 3.14      | 3.87 | 4.47 | 4.59 | 4.84 | 3.09          | 3.36 | 3.68 | 3.75 | 3.90 |
|                 | f | 1.05      | 0.00 | 0.05 | 0.00 | 0.01 | 1.04          | 0.00 | 0.00 | 0.00 | 0.00 |
| BNL             | E | 3.21      | 4.36 | 4.69 | 5.16 | 5.36 | 3.15          | 3.59 | 3.88 | 4.03 | 4.15 |
|                 | f | 1.15      | 0.00 | 0.06 | 0.00 | 0.00 | 1.14          | 0.00 | 0.00 | 0.00 | 0.00 |
| $\omega$ B97X   | E | 3.16      | 4.21 | 4.57 | 4.92 | 5.12 | 3.11          | 3.85 | 4.10 | 4.24 | 4.40 |
|                 | f | 1.09      | 0.00 | 0.05 | 0.00 | 0.02 | 1.09          | 0.00 | 0.00 | 0.00 | 0.00 |
| $\omega$ B97X-D | E | 3.14      | 3.94 | 4.47 | 4.67 | 4.88 | 3.09          | 3.48 | 3.78 | 3.86 | 4.02 |
|                 | f | 1.05      | 0.00 | 0.05 | 0.00 | 0.01 | 1.05          | 0.00 | 0.00 | 0.00 | 0.00 |
| M06-2X          | E | 3.12      | 3.84 | 4.51 | 4.69 | 4.71 | 2.86          | 3.07 | 3.34 | 3.42 | 3.45 |
|                 | f | 1.04      | 0.00 | 0.06 | 0.00 | 0.00 | 0.00          | 1.03 | 0.00 | 0.00 | 0.01 |
| M11             | E | 3.12      | 4.01 | 4.61 | 4.79 | 5.06 | 2.78          | 3.06 | 3.10 | 3.17 | 3.23 |
|                 | f | 1.07      | 0.00 | 0.05 | 0.00 | 0.01 | 0.00          | 1.02 | 0.00 | 0.00 | 0.03 |
| M11-L           | E | 2.88      | 3.06 | 3.10 | 3.93 | 3.96 | 1.02          | 1.49 | 1.61 | 1.84 | 1.96 |
|                 | f | 0.00      | 0.90 | 0.00 | 0.00 | 0.00 | 0.00          | 0.00 | 0.01 | 0.00 | 0.00 |
| CC2             | E | 2.92      | 3.30 | 4.30 | 4.54 | 4.57 | 2.77          | 2.85 | 3.24 | 3.25 | 3.35 |
|                 | f | 1.17      | 0.00 | 0.07 | 0.00 | 0.00 | 1.17          | 0.00 | 0.07 | 0.00 | 0.00 |

**Table S9: TDDFT and CC2 excitation energies (E, in eV) and oscillator strengths (f) for p-HBDI with the def2-TZVP and aug-def2-TZVP basis sets.**

| molecule        |   | def2-TZVP |      |      |      |      | aug-def2-TZVP |      |      |      |      |
|-----------------|---|-----------|------|------|------|------|---------------|------|------|------|------|
|                 |   | 1a        | 2a   | 3a   | 4a   | 5a   | 1a            | 2a   | 3a   | 4a   | 5a   |
| RPA             | E | 4.13      | 5.33 | 5.63 | 5.80 | 6.63 | 4.10          | 5.26 | 5.42 | 5.63 | 5.74 |
|                 | f | 0.93      | 0.02 | 0.00 | 0.05 | 0.12 | 0.90          | 0.02 | 0.00 | 0.00 | 0.00 |
| B3LYP           | E | 3.44      | 3.66 | 4.16 | 4.27 | 4.77 | 3.42          | 3.65 | 4.15 | 4.24 | 4.61 |
|                 | f | 0.69      | 0.00 | 0.07 | 0.00 | 0.08 | 0.68          | 0.00 | 0.07 | 0.00 | 0.00 |
| BHLYP           | E | 3.77      | 4.50 | 4.81 | 4.96 | 5.62 | 3.74          | 4.49 | 4.77 | 4.95 | 5.21 |
|                 | f | 0.82      | 0.00 | 0.02 | 0.03 | 0.15 | 0.80          | 0.00 | 0.02 | 0.03 | 0.00 |
| CAM-B3LYP       | E | 3.67      | 4.11 | 4.67 | 4.74 | 5.54 | 3.64          | 4.10 | 4.64 | 4.71 | 5.18 |
|                 | f | 0.76      | 0.00 | 0.03 | 0.04 | 0.16 | 0.75          | 0.00 | 0.03 | 0.05 | 0.00 |
| CAMh-B3LYP      | E | 3.60      | 3.97 | 4.53 | 4.59 | 5.30 | 3.57          | 3.96 | 4.51 | 4.56 | 4.99 |
|                 | f | 0.74      | 0.00 | 0.06 | 0.02 | 0.13 | 0.73          | 0.00 | 0.06 | 0.03 | 0.00 |
| BP86            | E | 3.00      | 3.18 | 3.63 | 3.78 | 4.11 | 3.00          | 3.16 | 3.62 | 3.76 | 4.09 |
|                 | f | 0.00      | 0.55 | 0.11 | 0.00 | 0.04 | 0.00          | 0.55 | 0.11 | 0.00 | 0.04 |
| PBE             | E | 2.98      | 3.18 | 3.62 | 3.78 | 4.11 | 2.98          | 3.16 | 3.61 | 3.75 | 4.09 |
|                 | f | 0.00      | 0.55 | 0.12 | 0.00 | 0.04 | 0.00          | 0.55 | 0.12 | 0.00 | 0.04 |
| PBE0            | E | 3.51      | 3.76 | 4.30 | 4.40 | 4.95 | 3.49          | 3.75 | 4.28 | 4.37 | 4.90 |
|                 | f | 0.71      | 0.00 | 0.08 | 0.00 | 0.09 | 0.70          | 0.00 | 0.08 | 0.00 | 0.09 |
| PBE50           | E | 3.78      | 4.44 | 4.84 | 4.96 | 5.65 | 3.76          | 4.43 | 4.80 | 4.95 | 5.45 |
|                 | f | 0.82      | 0.00 | 0.02 | 0.04 | 0.15 | 0.81          | 0.00 | 0.02 | 0.04 | 0.00 |
| $\omega$ PBE    | E | 3.70      | 3.95 | 4.73 | 4.77 | 5.39 | 3.67          | 3.94 | 4.70 | 4.74 | 5.37 |
|                 | f | 0.74      | 0.00 | 0.04 | 0.08 | 0.00 | 0.73          | 0.00 | 0.03 | 0.08 | 0.00 |
| $\omega$ hPBE0  | E | 3.58      | 3.88 | 4.48 | 4.55 | 5.21 | 3.55          | 3.87 | 4.47 | 4.53 | 5.10 |
|                 | f | 0.73      | 0.00 | 0.08 | 0.01 | 0.11 | 0.72          | 0.00 | 0.08 | 0.01 | 0.00 |
| $\omega$ PBEh   | E | 3.67      | 3.98 | 4.69 | 4.73 | 5.46 | 3.64          | 3.97 | 4.66 | 4.70 | 5.35 |
|                 | f | 0.74      | 0.00 | 0.06 | 0.04 | 0.00 | 0.73          | 0.00 | 0.05 | 0.05 | 0.00 |
| BNL             | E | 3.90      | 4.46 | 4.98 | 5.23 | 5.89 | 3.87          | 4.44 | 4.93 | 5.20 | 5.53 |
|                 | f | 0.82      | 0.00 | 0.03 | 0.05 | 0.00 | 0.81          | 0.00 | 0.03 | 0.05 | 0.00 |
| $\omega$ B97X   | E | 3.78      | 4.27 | 4.84 | 4.98 | 5.73 | 3.76          | 4.26 | 4.81 | 4.96 | 5.72 |
|                 | f | 0.78      | 0.00 | 0.02 | 0.06 | 0.00 | 0.77          | 0.00 | 0.02 | 0.06 | 0.00 |
| $\omega$ B97X-D | E | 3.68      | 4.06 | 4.71 | 4.76 | 5.53 | 3.66          | 4.05 | 4.68 | 4.74 | 5.47 |
|                 | f | 0.75      | 0.00 | 0.04 | 0.05 | 0.00 | 0.74          | 0.00 | 0.04 | 0.06 | 0.00 |
| M06-2X          | E | 3.67      | 4.08 | 4.71 | 4.75 | 5.55 | 3.65          | 4.07 | 4.68 | 4.73 | 5.06 |
|                 | f | 0.75      | 0.00 | 0.05 | 0.03 | 0.15 | 0.74          | 0.00 | 0.04 | 0.05 | 0.00 |
| M11             | E | 3.74      | 4.12 | 4.89 | 4.92 | 5.59 | 3.71          | 4.11 | 4.84 | 4.86 | 4.90 |
|                 | f | 0.76      | 0.00 | 0.05 | 0.05 | 0.00 | 0.75          | 0.00 | 0.03 | 0.00 | 0.07 |
| M11-L           | E | 3.34      | 3.55 | 3.92 | 4.01 | 4.33 | 3.22          | 3.28 | 3.35 | 3.55 | 3.89 |
|                 | f | 0.65      | 0.00 | 0.05 | 0.01 | 0.05 | 0.00          | 0.00 | 0.66 | 0.00 | 0.02 |
| CC2             | E | 3.71      | 3.90 | 4.53 | 4.56 | 5.57 | 3.66          | 3.87 | 4.49 | 4.51 | 5.01 |
|                 | f | 0.77      | 0.00 | 0.15 | 0.00 | 0.16 | 0.77          | 0.00 | 0.15 | 0.00 | 0.16 |

**Table S10: TDDFT and CC2 excitation energies (E, in eV) and oscillator strengths (f) for p-HBDI<sup>+</sup> with the def2-TZVP and aug-def2-TZVP basis sets.**

| molecule        |   | def2-TZVP |      |      |      |      | aug-def2-TZVP |      |      |      |      |
|-----------------|---|-----------|------|------|------|------|---------------|------|------|------|------|
|                 |   | 1a        | 2a   | 3a   | 4a   | 5a   | 1a            | 2a   | 3a   | 4a   | 5a   |
| RPA             | E | 3.76      | 5.03 | 5.82 | 6.44 | 6.62 | 3.74          | 5.01 | 5.79 | 6.17 | 6.36 |
|                 | f | 1.13      | 0.02 | 0.03 | 0.20 | 0.01 | 1.12          | 0.02 | 0.03 | 0.00 | 0.18 |
| B3LYP           | E | 3.25      | 3.67 | 4.01 | 4.14 | 5.03 | 3.24          | 3.66 | 4.00 | 4.13 | 4.98 |
|                 | f | 0.93      | 0.03 | 0.00 | 0.02 | 0.06 | 0.92          | 0.03 | 0.00 | 0.02 | 0.04 |
| BHLYP           | E | 3.45      | 4.26 | 4.87 | 5.09 | 5.62 | 3.44          | 4.25 | 4.86 | 5.08 | 5.57 |
|                 | f | 1.02      | 0.02 | 0.01 | 0.00 | 0.09 | 1.02          | 0.02 | 0.01 | 0.00 | 0.08 |
| CAM-B3LYP       | E | 3.34      | 4.17 | 4.56 | 4.68 | 5.45 | 3.32          | 4.16 | 4.55 | 4.66 | 5.41 |
|                 | f | 0.99      | 0.02 | 0.00 | 0.01 | 0.09 | 0.98          | 0.02 | 0.00 | 0.02 | 0.08 |
| CAMh-B3LYP      | E | 3.31      | 4.01 | 4.38 | 4.51 | 5.32 | 3.30          | 4.00 | 4.37 | 4.50 | 5.28 |
|                 | f | 0.97      | 0.02 | 0.00 | 0.02 | 0.08 | 0.96          | 0.02 | 0.00 | 0.02 | 0.07 |
| BP86            | E | 3.09      | 3.26 | 3.28 | 3.63 | 4.34 | 3.08          | 3.25 | 3.27 | 3.62 | 4.33 |
|                 | f | 0.77      | 0.00 | 0.06 | 0.04 | 0.02 | 0.78          | 0.00 | 0.06 | 0.04 | 0.02 |
| PBE             | E | 3.09      | 3.24 | 3.28 | 3.62 | 4.33 | 3.08          | 3.23 | 3.27 | 3.61 | 4.31 |
|                 | f | 0.77      | 0.00 | 0.07 | 0.04 | 0.02 | 0.77          | 0.00 | 0.06 | 0.04 | 0.02 |
| PBE0            | E | 3.30      | 3.80 | 4.15 | 4.27 | 5.16 | 3.29          | 3.79 | 4.14 | 4.26 | 5.12 |
|                 | f | 0.96      | 0.02 | 0.00 | 0.02 | 0.06 | 0.95          | 0.02 | 0.00 | 0.02 | 0.06 |
| PBE50           | E | 3.47      | 4.29 | 4.87 | 5.03 | 5.65 | 3.45          | 4.28 | 4.86 | 5.02 | 5.61 |
|                 | f | 1.03      | 0.02 | 0.01 | 0.00 | 0.09 | 1.02          | 0.02 | 0.01 | 0.00 | 0.09 |
| $\omega$ PBE    | E | 3.31      | 4.30 | 4.36 | 4.74 | 5.52 | 3.29          | 4.29 | 4.35 | 4.73 | 5.48 |
|                 | f | 1.00      | 0.01 | 0.00 | 0.02 | 0.10 | 0.99          | 0.01 | 0.00 | 0.02 | 0.10 |
| $\omega$ hPBE0  | E | 3.32      | 3.96 | 4.29 | 4.45 | 5.30 | 3.31          | 3.95 | 4.28 | 4.44 | 5.26 |
|                 | f | 0.97      | 0.02 | 0.00 | 0.03 | 0.07 | 0.96          | 0.02 | 0.00 | 0.02 | 0.07 |
| $\omega$ PBEh   | E | 3.34      | 4.18 | 4.40 | 4.66 | 5.46 | 3.32          | 4.17 | 4.39 | 4.65 | 5.42 |
|                 | f | 0.99      | 0.02 | 0.00 | 0.02 | 0.09 | 0.99          | 0.02 | 0.00 | 0.02 | 0.08 |
| BNL             | E | 3.43      | 4.68 | 5.04 | 5.25 | 5.89 | 3.41          | 4.66 | 5.02 | 5.22 | 5.83 |
|                 | f | 1.07      | 0.01 | 0.00 | 0.01 | 0.16 | 1.07          | 0.01 | 0.00 | 0.01 | 0.15 |
| $\omega$ B97X   | E | 3.38      | 4.43 | 4.78 | 4.95 | 5.67 | 3.36          | 4.42 | 4.77 | 4.93 | 5.63 |
|                 | f | 1.02      | 0.01 | 0.00 | 0.01 | 0.12 | 1.02          | 0.01 | 0.00 | 0.01 | 0.11 |
| $\omega$ B97X-D | E | 3.35      | 4.20 | 4.50 | 4.70 | 5.48 | 3.33          | 4.19 | 4.49 | 4.69 | 5.45 |
|                 | f | 0.99      | 0.02 | 0.00 | 0.02 | 0.09 | 0.99          | 0.02 | 0.00 | 0.02 | 0.09 |
| M06-2X          | E | 3.33      | 4.19 | 4.62 | 4.71 | 5.50 | 3.31          | 4.18 | 4.61 | 4.69 | 5.44 |
|                 | f | 0.99      | 0.02 | 0.00 | 0.01 | 0.09 | 0.98          | 0.02 | 0.00 | 0.01 | 0.08 |
| M11             | E | 3.35      | 4.43 | 4.68 | 4.91 | 5.69 | 3.33          | 4.42 | 4.67 | 4.89 | 5.63 |
|                 | f | 1.01      | 0.02 | 0.00 | 0.01 | 0.11 | 1.00          | 0.02 | 0.00 | 0.01 | 0.07 |
| M11-L           | E | 3.22      | 3.46 | 3.85 | 3.93 | 4.60 | 3.20          | 3.45 | 3.73 | 3.84 | 3.93 |
|                 | f | 0.81      | 0.06 | 0.02 | 0.01 | 0.00 | 0.81          | 0.06 | 0.00 | 0.02 | 0.01 |
| CC2             | E | 3.15      | 4.03 | 4.36 | 4.44 | 5.32 | 3.12          | 4.00 | 4.33 | 4.41 | 5.25 |
|                 | f | 1.09      | 0.02 | 0.00 | 0.00 | 0.10 | 1.09          | 0.02 | 0.00 | 0.00 | 0.10 |

**Table S11: TDDFT and CC2 excitation energies (E, in eV) and oscillator strengths (f) for PSBT<sup>+</sup> with the def2-TZVP and aug-def2-TZVP basis sets.**

| molecule        |   | def2-TZVP |      |      |      |      | aug-def2-TZVP |      |      |      |      |
|-----------------|---|-----------|------|------|------|------|---------------|------|------|------|------|
|                 |   | 1a        | 2a   | 3a   | 4a   | 5a   | 1a            | 2a   | 3a   | 4a   | 5a   |
| RPA             | E | 2.78      | 4.51 | 5.68 | 5.73 | 6.68 | 2.77          | 4.49 | 5.44 | 5.66 | 5.73 |
|                 | f | 2.38      | 0.23 | 0.01 | 0.05 | 0.15 | 2.38          | 0.23 | 0.00 | 0.01 | 0.05 |
| B3LYP           | E | 2.29      | 3.12 | 3.83 | 3.88 | 4.15 | 2.28          | 3.11 | 3.83 | 3.88 | 4.15 |
|                 | f | 1.66      | 0.64 | 0.01 | 0.01 | 0.02 | 1.66          | 0.63 | 0.01 | 0.01 | 0.02 |
| BHLYP           | E | 2.49      | 3.72 | 4.52 | 4.90 | 5.20 | 2.48          | 3.71 | 4.50 | 4.89 | 5.20 |
|                 | f | 2.05      | 0.35 | 0.03 | 0.05 | 0.01 | 2.04          | 0.34 | 0.03 | 0.05 | 0.01 |
| CAM-B3LYP       | E | 2.42      | 3.67 | 4.49 | 4.81 | 4.97 | 2.41          | 3.67 | 4.48 | 4.80 | 4.97 |
|                 | f | 2.00      | 0.32 | 0.03 | 0.03 | 0.01 | 2.00          | 0.32 | 0.03 | 0.03 | 0.01 |
| CAMh-B3LYP      | E | 2.38      | 3.50 | 4.29 | 4.56 | 4.69 | 2.37          | 3.49 | 4.27 | 4.56 | 4.68 |
|                 | f | 1.91      | 0.39 | 0.02 | 0.01 | 0.05 | 1.91          | 0.38 | 0.02 | 0.02 | 0.04 |
| BP86            | E | 2.10      | 2.73 | 2.97 | 3.18 | 3.29 | 2.10          | 2.73 | 2.97 | 3.18 | 3.29 |
|                 | f | 1.12      | 1.03 | 0.00 | 0.00 | 0.00 | 1.12          | 1.03 | 0.00 | 0.00 | 0.00 |
| PBE             | E | 2.10      | 2.73 | 2.95 | 3.17 | 3.28 | 2.09          | 2.72 | 2.94 | 3.17 | 3.27 |
|                 | f | 1.11      | 1.02 | 0.00 | 0.00 | 0.00 | 1.12          | 1.01 | 0.00 | 0.00 | 0.00 |
| PBE0            | E | 2.32      | 3.22 | 3.96 | 4.01 | 4.29 | 2.31          | 3.21 | 3.95 | 4.00 | 4.28 |
|                 | f | 1.75      | 0.57 | 0.01 | 0.01 | 0.02 | 1.74          | 0.56 | 0.01 | 0.01 | 0.03 |
| PBE50           | E | 2.49      | 3.71 | 4.54 | 4.90 | 5.11 | 2.48          | 3.71 | 4.52 | 4.89 | 5.11 |
|                 | f | 2.05      | 0.36 | 0.03 | 0.05 | 0.01 | 2.04          | 0.35 | 0.03 | 0.04 | 0.01 |
| $\omega$ PBE    | E | 2.42      | 3.83 | 4.81 | 4.94 | 5.15 | 2.41          | 3.82 | 4.79 | 4.93 | 5.14 |
|                 | f | 2.04      | 0.26 | 0.03 | 0.02 | 0.01 | 2.04          | 0.25 | 0.03 | 0.02 | 0.00 |
| $\omega$ hPBE0  | E | 2.37      | 3.44 | 4.22 | 4.39 | 4.59 | 2.37          | 3.43 | 4.21 | 4.38 | 4.58 |
|                 | f | 1.88      | 0.42 | 0.02 | 0.00 | 0.06 | 1.88          | 0.41 | 0.02 | 0.00 | 0.06 |
| $\omega$ PBEh   | E | 2.42      | 3.75 | 4.62 | 4.85 | 5.00 | 2.42          | 3.75 | 4.61 | 4.84 | 5.00 |
|                 | f | 2.03      | 0.29 | 0.03 | 0.03 | 0.01 | 2.03          | 0.28 | 0.03 | 0.03 | 0.01 |
| BNL             | E | 2.54      | 4.11 | 5.23 | 5.29 | 5.80 | 2.53          | 4.10 | 5.20 | 5.27 | 5.56 |
|                 | f | 2.22      | 0.22 | 0.00 | 0.07 | 0.00 | 2.20          | 0.22 | 0.00 | 0.07 | 0.00 |
| $\omega$ B97X   | E | 2.48      | 3.95 | 4.94 | 5.08 | 5.49 | 2.47          | 3.94 | 4.93 | 5.06 | 5.48 |
|                 | f | 2.10      | 0.24 | 0.03 | 0.03 | 0.01 | 2.10          | 0.24 | 0.03 | 0.03 | 0.01 |
| $\omega$ B97X-D | E | 2.44      | 3.78 | 4.65 | 4.89 | 5.10 | 2.43          | 3.77 | 4.63 | 4.88 | 5.09 |
|                 | f | 2.04      | 0.28 | 0.03 | 0.03 | 0.01 | 2.04          | 0.28 | 0.03 | 0.03 | 0.01 |
| M06-2X          | E | 2.37      | 3.60 | 4.45 | 4.66 | 4.80 | 2.37          | 3.59 | 4.44 | 4.66 | 4.79 |
|                 | f | 1.94      | 0.34 | 0.03 | 0.01 | 0.04 | 1.94          | 0.34 | 0.03 | 0.01 | 0.03 |
| M11             | E | 2.44      | 3.89 | 4.90 | 5.02 | 5.27 | 2.44          | 3.88 | 4.86 | 4.87 | 5.01 |
|                 | f | 2.07      | 0.25 | 0.03 | 0.03 | 0.00 | 2.07          | 0.24 | 0.00 | 0.03 | 0.03 |
| M11-L           | E | 2.20      | 2.83 | 3.34 | 3.46 | 3.64 | 2.19          | 2.82 | 3.34 | 3.45 | 3.58 |
|                 | f | 1.20      | 1.00 | 0.00 | 0.02 | 0.00 | 1.19          | 0.99 | 0.00 | 0.02 | 0.00 |
| CC2             | E | 2.17      | 3.35 | 4.22 | 4.54 | 4.73 | 2.16          | 3.34 | 4.20 | 4.52 | 4.70 |
|                 | f | 1.92      | 0.50 | 0.10 | 0.01 | 0.05 | 1.92          | 0.50 | 0.10 | 0.01 | 0.05 |

**Table S12: TDDFT and CC2 excitation energies (E, in eV) and oscillator strengths (f) for PSB11Me<sub>2</sub><sup>+</sup> with the def2-TZVP and aug-def2-TZVP basis sets.**

| molecule        |   | def2-TZVP |      |      |      |      | aug-def2-TZVP |      |      |      |      |
|-----------------|---|-----------|------|------|------|------|---------------|------|------|------|------|
|                 |   | 1a        | 2a   | 3a   | 4a   | 5a   | 1a            | 2a   | 3a   | 4a   | 5a   |
| RPA             | E | 2.77      | 4.46 | 5.60 | 5.66 | 6.60 | 2.76          | 4.44 | 5.47 | 5.55 | 5.68 |
|                 | f | 2.01      | 0.36 | 0.07 | 0.04 | 0.17 | 2.00          | 0.36 | 0.00 | 0.08 | 0.03 |
| B3LYP           | E | 2.27      | 3.09 | 3.80 | 3.88 | 4.15 | 2.26          | 3.08 | 3.79 | 3.88 | 4.14 |
|                 | f | 1.35      | 0.53 | 0.06 | 0.01 | 0.06 | 1.36          | 0.53 | 0.07 | 0.01 | 0.07 |
| BHLYP           | E | 2.47      | 3.69 | 4.44 | 4.86 | 5.20 | 2.46          | 3.69 | 4.41 | 4.85 | 5.19 |
|                 | f | 1.69      | 0.35 | 0.15 | 0.03 | 0.00 | 1.68          | 0.35 | 0.16 | 0.03 | 0.00 |
| CAM-B3LYP       | E | 2.40      | 3.65 | 4.41 | 4.78 | 4.97 | 2.39          | 3.64 | 4.39 | 4.77 | 4.96 |
|                 | f | 1.65      | 0.34 | 0.13 | 0.02 | 0.01 | 1.65          | 0.33 | 0.13 | 0.02 | 0.01 |
| CAMh-B3LYP      | E | 2.36      | 3.48 | 4.21 | 4.55 | 4.66 | 2.35          | 3.47 | 4.20 | 4.55 | 4.66 |
|                 | f | 1.57      | 0.37 | 0.13 | 0.03 | 0.03 | 1.56          | 0.36 | 0.13 | 0.02 | 0.03 |
| BP86            | E | 2.09      | 2.71 | 2.97 | 3.17 | 3.29 | 2.08          | 2.70 | 2.97 | 3.17 | 3.28 |
|                 | f | 0.90      | 0.85 | 0.00 | 0.00 | 0.01 | 0.90          | 0.83 | 0.00 | 0.00 | 0.01 |
| PBE             | E | 2.08      | 2.70 | 2.95 | 3.16 | 3.27 | 2.08          | 2.70 | 2.95 | 3.16 | 3.27 |
|                 | f | 0.90      | 0.85 | 0.00 | 0.00 | 0.00 | 0.90          | 0.85 | 0.00 | 0.00 | 0.01 |
| PBE0            | E | 2.30      | 3.19 | 3.92 | 4.01 | 4.28 | 2.29          | 3.18 | 3.91 | 4.01 | 4.26 |
|                 | f | 1.43      | 0.49 | 0.08 | 0.01 | 0.07 | 1.42          | 0.49 | 0.08 | 0.01 | 0.08 |
| PBE50           | E | 2.46      | 3.69 | 4.45 | 4.86 | 5.11 | 2.46          | 3.68 | 4.43 | 4.85 | 5.11 |
|                 | f | 1.69      | 0.36 | 0.15 | 0.03 | 0.00 | 1.68          | 0.36 | 0.15 | 0.03 | 0.00 |
| $\omega$ PBE    | E | 2.39      | 3.79 | 4.72 | 4.90 | 5.13 | 2.38          | 3.78 | 4.70 | 4.89 | 5.13 |
|                 | f | 1.69      | 0.31 | 0.12 | 0.01 | 0.00 | 1.69          | 0.30 | 0.12 | 0.01 | 0.00 |
| $\omega$ hPBE0  | E | 2.35      | 3.41 | 4.15 | 4.39 | 4.55 | 2.34          | 3.41 | 4.13 | 4.38 | 4.54 |
|                 | f | 1.54      | 0.39 | 0.12 | 0.01 | 0.07 | 1.54          | 0.39 | 0.12 | 0.01 | 0.06 |
| $\omega$ PBEh   | E | 2.40      | 3.72 | 4.54 | 4.82 | 4.99 | 2.39          | 3.71 | 4.52 | 4.81 | 4.99 |
|                 | f | 1.67      | 0.32 | 0.12 | 0.02 | 0.01 | 1.67          | 0.32 | 0.12 | 0.01 | 0.00 |
| BNL             | E | 2.52      | 4.07 | 5.16 | 5.23 | 5.76 | 2.51          | 4.06 | 5.13 | 5.21 | 5.55 |
|                 | f | 1.86      | 0.31 | 0.11 | 0.03 | 0.00 | 1.83          | 0.31 | 0.11 | 0.03 | 0.00 |
| $\omega$ B97X   | E | 2.45      | 3.91 | 4.85 | 5.04 | 5.47 | 2.45          | 3.90 | 4.83 | 5.03 | 5.47 |
|                 | f | 1.75      | 0.31 | 0.12 | 0.01 | 0.00 | 1.74          | 0.31 | 0.12 | 0.01 | 0.00 |
| $\omega$ B97X-D | E | 2.41      | 3.75 | 4.56 | 4.85 | 5.08 | 2.40          | 3.74 | 4.54 | 4.84 | 5.08 |
|                 | f | 1.68      | 0.32 | 0.12 | 0.02 | 0.00 | 1.68          | 0.32 | 0.12 | 0.01 | 0.00 |
| M06-2X          | E | 2.36      | 3.58 | 4.38 | 4.66 | 4.78 | 2.35          | 3.57 | 4.35 | 4.66 | 4.77 |
|                 | f | 1.60      | 0.34 | 0.13 | 0.01 | 0.02 | 1.60          | 0.34 | 0.13 | 0.01 | 0.02 |
| M11             | E | 2.42      | 3.85 | 4.81 | 4.97 | 5.24 | 2.41          | 3.84 | 4.77 | 4.90 | 4.97 |
|                 | f | 1.72      | 0.31 | 0.11 | 0.01 | 0.00 | 1.71          | 0.30 | 0.11 | 0.00 | 0.01 |
| M11-L           | E | 2.19      | 2.79 | 3.35 | 3.44 | 3.63 | 2.18          | 2.78 | 3.35 | 3.43 | 3.52 |
|                 | f | 0.98      | 0.82 | 0.00 | 0.03 | 0.00 | 0.97          | 0.81 | 0.00 | 0.04 | 0.00 |
| CC2             | E | 2.17      | 3.34 | 4.16 | 4.53 | 4.70 | 2.16          | 3.32 | 4.14 | 4.51 | 4.68 |
|                 | f | 1.56      | 0.47 | 0.15 | 0.06 | 0.07 | 1.56          | 0.47 | 0.15 | 0.06 | 0.07 |

**Table S13: TDA and CC2 excitation energies (E, in eV) and oscillator strengths (f) for pVP with the def2-TZVP and aug-def2-TZVP basis sets.**

| molecule        |   | def2-TZVP |      |      |      |      | aug-def2-TZVP |      |      |      |      |
|-----------------|---|-----------|------|------|------|------|---------------|------|------|------|------|
|                 |   | 1a        | 2a   | 3a   | 4a   | 5a   | 1a            | 2a   | 3a   | 4a   | 5a   |
| CIS             | E | 5.31      | 5.62 | 7.01 | 7.14 | 7.51 | 5.18          | 5.53 | 5.56 | 5.88 | 6.06 |
|                 | f | 0.35      | 0.13 | 0.71 | 0.00 | 0.78 | 0.33          | 0.11 | 0.01 | 0.00 | 0.00 |
| B3LYP           | E | 4.58      | 5.02 | 5.60 | 5.98 | 6.21 | 4.51          | 4.76 | 4.90 | 5.16 | 5.37 |
|                 | f | 0.07      | 0.52 | 0.00 | 0.18 | 0.07 | 0.09          | 0.00 | 0.46 | 0.01 | 0.00 |
| BHLYP           | E | 4.97      | 5.30 | 6.30 | 6.69 | 6.90 | 4.88          | 5.20 | 5.32 | 5.64 | 5.87 |
|                 | f | 0.14      | 0.45 | 0.00 | 0.22 | 0.85 | 0.17          | 0.37 | 0.00 | 0.01 | 0.00 |
| CAM-B3LYP       | E | 4.84      | 5.25 | 6.19 | 6.59 | 6.85 | 4.77          | 5.14 | 5.26 | 5.61 | 5.85 |
|                 | f | 0.09      | 0.52 | 0.00 | 0.25 | 0.74 | 0.11          | 0.45 | 0.00 | 0.01 | 0.00 |
| CAMh-B3LYP      | E | 4.76      | 5.18 | 6.00 | 6.41 | 6.77 | 4.69          | 5.07 | 5.09 | 5.45 | 5.67 |
|                 | f | 0.08      | 0.53 | 0.00 | 0.25 | 0.00 | 0.10          | 0.46 | 0.00 | 0.01 | 0.00 |
| BP86            | E | 4.26      | 4.75 | 5.39 | 5.40 | 5.59 | 4.22          | 4.62 | 4.66 | 5.06 | 5.34 |
|                 | f | 0.05      | 0.46 | 0.06 | 0.00 | 0.22 | 0.05          | 0.00 | 0.44 | 0.01 | 0.06 |
| PBE             | E | 4.26      | 4.75 | 5.39 | 5.59 | 5.89 | 4.21          | 4.45 | 4.65 | 4.91 | 5.32 |
|                 | f | 0.05      | 0.46 | 0.05 | 0.23 | 0.03 | 0.06          | 0.00 | 0.43 | 0.00 | 0.05 |
| PBE0            | E | 4.69      | 5.12 | 5.95 | 6.16 | 6.43 | 4.62          | 5.01 | 5.05 | 5.42 | 5.62 |
|                 | f | 0.08      | 0.53 | 0.00 | 0.20 | 0.06 | 0.09          | 0.47 | 0.00 | 0.01 | 0.00 |
| PBE50           | E | 5.01      | 5.35 | 6.62 | 6.74 | 6.96 | 4.94          | 5.27 | 5.58 | 5.89 | 6.11 |
|                 | f | 0.13      | 0.47 | 0.00 | 0.23 | 0.82 | 0.16          | 0.41 | 0.00 | 0.01 | 0.00 |
| $\omega$ PBE    | E | 4.87      | 5.34 | 6.69 | 6.75 | 6.97 | 4.82          | 5.25 | 5.63 | 5.99 | 6.22 |
|                 | f | 0.06      | 0.57 | 0.00 | 0.25 | 0.76 | 0.07          | 0.52 | 0.00 | 0.01 | 0.00 |
| $\omega$ hPBE0  | E | 4.77      | 5.19 | 6.19 | 6.35 | 6.71 | 4.70          | 5.09 | 5.22 | 5.56 | 5.76 |
|                 | f | 0.08      | 0.54 | 0.00 | 0.24 | 0.06 | 0.10          | 0.48 | 0.00 | 0.01 | 0.00 |
| $\omega$ PBEh   | E | 4.85      | 5.28 | 6.51 | 6.61 | 6.90 | 4.79          | 5.19 | 5.42 | 5.75 | 5.95 |
|                 | f | 0.07      | 0.55 | 0.00 | 0.26 | 0.70 | 0.09          | 0.49 | 0.00 | 0.01 | 0.00 |
| BNL             | E | 5.09      | 5.46 | 6.67 | 7.01 | 7.18 | 5.00          | 5.36 | 5.64 | 6.02 | 6.29 |
|                 | f | 0.12      | 0.49 | 0.00 | 0.35 | 0.89 | 0.14          | 0.41 | 0.00 | 0.01 | 0.00 |
| $\omega$ B97X   | E | 4.96      | 5.35 | 6.84 | 6.88 | 6.98 | 4.91          | 5.28 | 5.87 | 6.21 | 6.49 |
|                 | f | 0.09      | 0.51 | 0.21 | 0.00 | 0.91 | 0.10          | 0.47 | 0.00 | 0.01 | 0.00 |
| $\omega$ B97X-D | E | 4.86      | 5.27 | 6.62 | 6.70 | 6.87 | 4.80          | 5.19 | 5.55 | 5.86 | 6.07 |
|                 | f | 0.08      | 0.53 | 0.25 | 0.00 | 0.74 | 0.09          | 0.48 | 0.00 | 0.01 | 0.00 |
| M06-2X          | E | 4.91      | 5.34 | 6.29 | 6.65 | 6.98 | 4.83          | 5.19 | 5.23 | 5.54 | 5.73 |
|                 | f | 0.09      | 0.56 | 0.00 | 0.29 | 0.67 | 0.10          | 0.00 | 0.48 | 0.01 | 0.00 |
| M11             | E | 5.02      | 5.41 | 6.52 | 6.86 | 7.03 | 4.93          | 4.97 | 5.28 | 5.31 | 5.46 |
|                 | f | 0.10      | 0.55 | 0.00 | 0.24 | 0.82 | 0.12          | 0.00 | 0.43 | 0.00 | 0.00 |
| M11-L           | E | 4.44      | 4.80 | 5.02 | 5.55 | 5.79 | 3.51          | 3.94 | 4.03 | 4.34 | 4.35 |
|                 | f | 0.09      | 0.42 | 0.00 | 0.10 | 0.00 | 0.00          | 0.00 | 0.00 | 0.11 | 0.00 |
| CC2             | E | 4.66      | 5.25 | 6.42 | 6.44 | 6.84 | 4.58          | 5.11 | 5.22 | 5.60 | 5.80 |
|                 | f | 0.05      | 0.52 | 0.00 | 0.28 | 0.45 | 0.05          | 0.52 | 0.00 | 0.28 | 0.45 |

Table S14: TDA and CC2 excitation energies (E, in eV) and oscillator strengths (f) for pCA with the def2-TZVP and aug-def2-TZVP basis sets.

| molecule        |   | def2-TZVP |      |      |      |      | aug-def2-TZVP |      |      |      |      |
|-----------------|---|-----------|------|------|------|------|---------------|------|------|------|------|
|                 |   | 1a        | 2a   | 3a   | 4a   | 5a   | 1a            | 2a   | 3a   | 4a   | 5a   |
| CIS             | E | 5.00      | 5.60 | 6.52 | 6.74 | 7.25 | 4.94          | 5.54 | 5.90 | 6.29 | 6.50 |
|                 | f | 0.76      | 0.03 | 0.00 | 0.52 | 0.59 | 0.72          | 0.04 | 0.00 | 0.00 | 0.00 |
| B3LYP           | E | 4.37      | 4.49 | 4.58 | 5.44 | 5.77 | 4.31          | 4.47 | 4.54 | 5.00 | 5.38 |
|                 | f | 0.77      | 0.00 | 0.13 | 0.14 | 0.15 | 0.77          | 0.00 | 0.12 | 0.00 | 0.15 |
| BHLYP           | E | 4.69      | 5.05 | 5.38 | 6.27 | 6.49 | 4.64          | 5.01 | 5.36 | 5.59 | 6.02 |
|                 | f | 0.86      | 0.08 | 0.00 | 0.27 | 0.00 | 0.83          | 0.08 | 0.00 | 0.00 | 0.00 |
| CAM-B3LYP       | E | 4.62      | 4.90 | 5.01 | 6.18 | 6.35 | 4.56          | 4.87 | 4.98 | 5.49 | 5.95 |
|                 | f | 0.81      | 0.13 | 0.00 | 0.27 | 0.00 | 0.79          | 0.13 | 0.00 | 0.00 | 0.00 |
| CAMh-B3LYP      | E | 4.54      | 4.81 | 4.86 | 5.94 | 6.17 | 4.48          | 4.77 | 4.83 | 5.33 | 5.80 |
|                 | f | 0.81      | 0.13 | 0.00 | 0.22 | 0.00 | 0.79          | 0.13 | 0.00 | 0.00 | 0.00 |
| BP86            | E | 3.69      | 4.08 | 4.19 | 4.83 | 5.10 | 3.68          | 4.04 | 4.17 | 4.79 | 5.05 |
|                 | f | 0.00      | 0.59 | 0.17 | 0.06 | 0.20 | 0.00          | 0.63 | 0.14 | 0.06 | 0.20 |
| PBE             | E | 3.67      | 4.08 | 4.19 | 4.83 | 5.09 | 3.66          | 4.03 | 4.16 | 4.78 | 5.04 |
|                 | f | 0.00      | 0.59 | 0.17 | 0.06 | 0.19 | 0.00          | 0.62 | 0.14 | 0.06 | 0.20 |
| PBE0            | E | 4.46      | 4.61 | 4.70 | 5.62 | 5.97 | 4.41          | 4.59 | 4.66 | 5.30 | 5.56 |
|                 | f | 0.81      | 0.00 | 0.12 | 0.16 | 0.14 | 0.80          | 0.00 | 0.12 | 0.00 | 0.17 |
| PBE50           | E | 4.73      | 5.08 | 5.34 | 6.31 | 6.62 | 4.68          | 5.05 | 5.32 | 5.85 | 6.24 |
|                 | f | 0.88      | 0.08 | 0.00 | 0.27 | 0.36 | 0.85          | 0.08 | 0.00 | 0.00 | 0.29 |
| $\omega$ PBE    | E | 4.70      | 4.89 | 4.94 | 6.41 | 6.58 | 4.64          | 4.86 | 4.91 | 5.84 | 6.30 |
|                 | f | 0.76      | 0.00 | 0.20 | 0.30 | 0.25 | 0.75          | 0.00 | 0.19 | 0.00 | 0.00 |
| $\omega$ hPBE0  | E | 4.55      | 4.77 | 4.80 | 5.86 | 6.25 | 4.49          | 4.75 | 4.77 | 5.46 | 5.80 |
|                 | f | 0.82      | 0.00 | 0.13 | 0.20 | 0.13 | 0.81          | 0.00 | 0.12 | 0.00 | 0.21 |
| $\omega$ PBEh   | E | 4.65      | 4.90 | 4.91 | 6.21 | 6.52 | 4.60          | 4.88 | 4.88 | 5.66 | 6.08 |
|                 | f | 0.80      | 0.03 | 0.12 | 0.26 | 0.27 | 0.79          | 0.12 | 0.03 | 0.00 | 0.00 |
| BNL             | E | 4.85      | 5.21 | 5.37 | 6.73 | 6.82 | 4.79          | 5.16 | 5.33 | 5.86 | 6.32 |
|                 | f | 0.80      | 0.13 | 0.00 | 0.29 | 0.00 | 0.76          | 0.14 | 0.00 | 0.00 | 0.00 |
| $\omega$ B97X   | E | 4.74      | 5.04 | 5.18 | 6.55 | 6.60 | 4.70          | 5.02 | 5.15 | 6.10 | 6.47 |
|                 | f | 0.79      | 0.13 | 0.00 | 0.29 | 0.38 | 0.78          | 0.13 | 0.00 | 0.00 | 0.40 |
| $\omega$ B97X-D | E | 4.65      | 4.92 | 4.97 | 6.23 | 6.51 | 4.60          | 4.89 | 4.95 | 5.80 | 6.16 |
|                 | f | 0.81      | 0.14 | 0.00 | 0.27 | 0.29 | 0.79          | 0.14 | 0.00 | 0.00 | 0.29 |
| M06-2X          | E | 4.67      | 4.97 | 5.02 | 6.22 | 6.45 | 4.62          | 4.93 | 5.00 | 5.44 | 5.86 |
|                 | f | 0.84      | 0.13 | 0.00 | 0.26 | 0.00 | 0.80          | 0.13 | 0.00 | 0.00 | 0.00 |
| M11             | E | 4.77      | 5.07 | 5.10 | 6.54 | 6.67 | 4.71          | 5.04 | 5.06 | 5.22 | 5.62 |
|                 | f | 0.85      | 0.00 | 0.11 | 0.33 | 0.29 | 0.81          | 0.00 | 0.12 | 0.00 | 0.00 |
| M11-L           | E | 4.21      | 4.25 | 4.41 | 5.05 | 5.34 | 3.75          | 4.16 | 4.19 | 4.20 | 4.38 |
|                 | f | 0.00      | 0.66 | 0.11 | 0.09 | 0.17 | 0.00          | 0.00 | 0.51 | 0.13 | 0.12 |
| CC2             | E | 4.52      | 4.77 | 4.96 | 6.02 | 6.43 | 4.44          | 4.72 | 4.90 | 5.45 | 5.88 |
|                 | f | 0.54      | 0.27 | 0.00 | 0.22 | 0.16 | 0.54          | 0.27 | 0.00 | 0.22 | 0.16 |

**Table S15:** TDA and CC2 excitation energies (**E**, in eV) and oscillator strengths (**f**) for pCA<sup>-</sup> with the def2-TZVP and aug-def2-TZVP basis sets.

| molecule        |   | def2-TZVP |      |      |      |      | aug-def2-TZVP |      |      |      |      |
|-----------------|---|-----------|------|------|------|------|---------------|------|------|------|------|
|                 |   | 1a        | 2a   | 3a   | 4a   | 5a   | 1a            | 2a   | 3a   | 4a   | 5a   |
| CIS             | E | 4.17      | 5.14 | 5.74 | 6.49 | 6.56 | 3.68          | 3.87 | 4.05 | 4.08 | 4.36 |
|                 | f | 1.27      | 0.12 | 0.00 | 0.00 | 0.00 | 0.01          | 0.00 | 1.16 | 0.00 | 0.00 |
| B3LYP           | E | 3.41      | 3.80 | 4.33 | 4.69 | 4.76 | 3.05          | 3.38 | 3.41 | 3.45 | 3.68 |
|                 | f | 0.00      | 1.28 | 0.18 | 0.00 | 0.08 | 0.00          | 0.00 | 0.00 | 0.00 | 1.23 |
| BHLYP           | E | 3.90      | 4.44 | 4.69 | 5.56 | 5.66 | 3.58          | 3.77 | 3.79 | 3.85 | 4.24 |
|                 | f | 1.33      | 0.00 | 0.13 | 0.11 | 0.00 | 0.00          | 0.00 | 1.26 | 0.00 | 0.00 |
| CAM-B3LYP       | E | 3.79      | 4.14 | 4.54 | 5.42 | 5.48 | 3.57          | 3.67 | 3.76 | 3.83 | 4.14 |
|                 | f | 1.29      | 0.00 | 0.13 | 0.10 | 0.00 | 0.00          | 1.24 | 0.00 | 0.00 | 0.00 |
| CAMh-B3LYP      | E | 3.79      | 3.92 | 4.48 | 5.20 | 5.25 | 3.40          | 3.59 | 3.67 | 3.67 | 3.92 |
|                 | f | 1.30      | 0.00 | 0.14 | 0.09 | 0.00 | 0.00          | 0.00 | 0.00 | 1.25 | 0.00 |
| BP86            | E | 2.57      | 3.73 | 3.87 | 4.07 | 4.22 | 2.58          | 2.88 | 3.26 | 3.35 | 3.62 |
|                 | f | 0.00      | 1.01 | 0.00 | 0.25 | 0.00 | 0.00          | 0.00 | 0.00 | 0.00 | 1.02 |
| PBE             | E | 2.55      | 3.73 | 3.85 | 4.07 | 4.18 | 2.56          | 2.75 | 3.11 | 3.22 | 3.57 |
|                 | f | 0.00      | 1.00 | 0.00 | 0.25 | 0.00 | 0.00          | 0.00 | 0.00 | 0.00 | 0.17 |
| PBE0            | E | 3.55      | 3.84 | 4.43 | 4.93 | 4.96 | 3.29          | 3.55 | 3.57 | 3.64 | 3.73 |
|                 | f | 0.00      | 1.32 | 0.16 | 0.08 | 0.00 | 0.00          | 0.00 | 0.00 | 0.00 | 1.27 |
| PBE50           | E | 3.92      | 4.39 | 4.73 | 5.59 | 5.82 | 3.79          | 3.83 | 3.97 | 4.04 | 4.39 |
|                 | f | 1.35      | 0.00 | 0.13 | 0.11 | 0.00 | 0.00          | 1.30 | 0.00 | 0.00 | 0.00 |
| $\omega$ PBE    | E | 3.74      | 4.15 | 4.56 | 5.33 | 5.36 | 3.64          | 3.83 | 4.02 | 4.15 | 4.16 |
|                 | f | 1.25      | 0.00 | 0.12 | 0.00 | 0.00 | 1.23          | 0.00 | 0.00 | 0.00 | 0.00 |
| $\omega$ hPBE0  | E | 3.80      | 3.83 | 4.49 | 5.11 | 5.14 | 3.49          | 3.68 | 3.72 | 3.74 | 3.80 |
|                 | f | 0.00      | 1.32 | 0.14 | 0.08 | 0.00 | 0.00          | 0.00 | 1.27 | 0.00 | 0.00 |
| $\omega$ PBEh   | E | 3.78      | 4.10 | 4.55 | 5.31 | 5.39 | 3.65          | 3.68 | 3.82 | 3.96 | 4.10 |
|                 | f | 1.27      | 0.00 | 0.12 | 0.00 | 0.02 | 0.00          | 1.23 | 0.00 | 0.00 | 0.00 |
| BNL             | E | 3.81      | 4.59 | 4.75 | 5.84 | 6.16 | 3.70          | 3.85 | 4.09 | 4.26 | 4.57 |
|                 | f | 1.25      | 0.00 | 0.13 | 0.00 | 0.00 | 1.20          | 0.01 | 0.00 | 0.00 | 0.00 |
| $\omega$ B97X   | E | 3.78      | 4.44 | 4.64 | 5.65 | 5.77 | 3.70          | 4.09 | 4.30 | 4.43 | 4.46 |
|                 | f | 1.25      | 0.00 | 0.12 | 0.00 | 0.00 | 1.21          | 0.01 | 0.00 | 0.00 | 0.00 |
| $\omega$ B97X-D | E | 3.78      | 4.17 | 4.55 | 5.40 | 5.42 | 3.69          | 3.76 | 3.93 | 4.08 | 4.17 |
|                 | f | 1.27      | 0.00 | 0.12 | 0.00 | 0.10 | 1.23          | 0.00 | 0.00 | 0.00 | 0.00 |
| M06-2X          | E | 3.77      | 4.10 | 4.59 | 5.47 | 5.48 | 3.37          | 3.57 | 3.62 | 3.67 | 4.01 |
|                 | f | 1.31      | 0.00 | 0.13 | 0.00 | 0.09 | 0.00          | 0.00 | 0.00 | 1.24 | 0.00 |
| M11             | E | 3.77      | 4.28 | 4.69 | 5.53 | 5.78 | 3.06          | 3.24 | 3.39 | 3.66 | 3.71 |
|                 | f | 1.26      | 0.00 | 0.11 | 0.00 | 0.12 | 0.00          | 0.00 | 0.00 | 1.16 | 0.00 |
| M11-L           | E | 3.12      | 3.82 | 4.03 | 4.22 | 4.46 | 1.60          | 2.10 | 2.14 | 2.31 | 2.50 |
|                 | f | 0.00      | 1.04 | 0.00 | 0.19 | 0.10 | 0.00          | 0.00 | 0.00 | 0.00 | 0.00 |
| CC2             | E | 3.24      | 3.54 | 4.23 | 4.50 | 5.27 | 3.25          | 3.43 | 3.53 | 3.88 | 4.01 |
|                 | f | 1.01      | 0.00 | 0.10 | 0.00 | 0.05 | 1.01          | 0.00 | 0.10 | 0.00 | 0.05 |



**Table S16:** TDA and CC2 excitation energies (E, in eV) and oscillator strengths (f) for pCA<sup>2-</sup> with the def2-TZVP and aug-def2-TZVP basis sets.

| molecule        |   | def2-TZVP |      |      |      |      | aug-def2-TZVP |      |      |      |      |
|-----------------|---|-----------|------|------|------|------|---------------|------|------|------|------|
|                 |   | 1a        | 2a   | 3a   | 4a   | 5a   | 1a            | 2a   | 3a   | 4a   | 5a   |
| CIS             | E | 5.09      | 5.42 | 5.76 | 6.33 | 6.39 | 4.51          | 4.94 | 5.01 | 5.11 | 5.29 |
|                 | f | 0.36      | 0.29 | 0.00 | 0.00 | 0.00 | 0.00          | 0.31 | 0.00 | 0.00 | 0.20 |
| B3LYP           | E | 2.67      | 2.82 | 3.07 | 3.22 | 3.31 | 2.65          | 2.73 | 2.81 | 2.88 | 3.06 |
|                 | f | 0.00      | 0.00 | 0.00 | 0.00 | 0.00 | 0.00          | 0.00 | 0.00 | 0.00 | 0.00 |
| BHLYP           | E | 4.12      | 4.25 | 4.60 | 4.81 | 5.07 | 4.11          | 4.16 | 4.29 | 4.51 | 4.55 |
|                 | f | 0.00      | 0.00 | 0.10 | 0.01 | 0.71 | 0.00          | 0.00 | 0.00 | 0.11 | 0.00 |
| CAM-B3LYP       | E | 3.72      | 3.74 | 4.47 | 4.51 | 4.87 | 3.78          | 3.79 | 4.11 | 4.23 | 4.35 |
|                 | f | 0.00      | 0.00 | 0.06 | 0.02 | 0.00 | 0.00          | 0.00 | 0.00 | 0.00 | 0.00 |
| CAMh-B3LYP      | E | 3.39      | 3.46 | 4.12 | 4.27 | 4.34 | 3.46          | 3.51 | 3.70 | 3.83 | 3.87 |
|                 | f | 0.00      | 0.00 | 0.01 | 0.00 | 0.02 | 0.00          | 0.00 | 0.00 | 0.00 | 0.00 |
| BP86            | E | 1.46      | 1.66 | 1.74 | 1.95 | 2.19 | 1.55          | 1.57 | 1.76 | 1.81 | 1.82 |
|                 | f | 0.00      | 0.00 | 0.00 | 0.00 | 0.00 | 0.00          | 0.00 | 0.00 | 0.00 | 0.00 |
| PBE             | E | 1.43      | 1.63 | 1.70 | 1.92 | 2.16 | 1.39          | 1.52 | 1.64 | 1.73 | 1.78 |
|                 | f | 0.00      | 0.00 | 0.00 | 0.00 | 0.00 | 0.00          | 0.00 | 0.00 | 0.00 | 0.00 |
| PBE0            | E | 2.90      | 3.01 | 3.40 | 3.50 | 3.56 | 2.96          | 3.05 | 3.07 | 3.19 | 3.44 |
|                 | f | 0.00      | 0.00 | 0.00 | 0.00 | 0.01 | 0.00          | 0.00 | 0.00 | 0.00 | 0.00 |
| PBE50           | E | 4.06      | 4.21 | 4.64 | 4.81 | 5.11 | 4.10          | 4.25 | 4.35 | 4.56 | 4.68 |
|                 | f | 0.00      | 0.00 | 0.10 | 0.00 | 0.73 | 0.00          | 0.00 | 0.00 | 0.11 | 0.00 |
| $\omega$ PBE    | E | 3.66      | 3.74 | 4.59 | 4.67 | 5.10 | 3.73          | 3.80 | 4.48 | 4.53 | 4.54 |
|                 | f | 0.00      | 0.00 | 0.07 | 0.00 | 0.77 | 0.00          | 0.00 | 0.01 | 0.05 | 0.04 |
| $\omega$ hPBE0  | E | 3.23      | 3.30 | 3.96 | 4.02 | 4.08 | 3.29          | 3.35 | 3.64 | 3.75 | 3.94 |
|                 | f | 0.00      | 0.00 | 0.01 | 0.00 | 0.00 | 0.00          | 0.00 | 0.00 | 0.00 | 0.00 |
| $\omega$ PBEh   | E | 3.60      | 3.65 | 4.46 | 4.52 | 4.96 | 3.66          | 3.71 | 4.29 | 4.35 | 4.39 |
|                 | f | 0.00      | 0.00 | 0.03 | 0.04 | 0.00 | 0.00          | 0.00 | 0.00 | 0.00 | 0.00 |
| BNL             | E | 4.47      | 4.65 | 4.85 | 5.27 | 5.66 | 4.51          | 4.67 | 4.69 | 4.75 | 5.14 |
|                 | f | 0.00      | 0.00 | 0.12 | 0.63 | 0.07 | 0.00          | 0.00 | 0.00 | 0.14 | 0.50 |
| $\omega$ B97X   | E | 4.09      | 4.14 | 4.68 | 5.03 | 5.16 | 4.14          | 4.20 | 4.62 | 4.84 | 5.00 |
|                 | f | 0.00      | 0.00 | 0.10 | 0.11 | 0.62 | 0.00          | 0.00 | 0.11 | 0.00 | 0.39 |
| $\omega$ B97X-D | E | 3.71      | 3.74 | 4.51 | 4.57 | 5.03 | 3.77          | 3.80 | 4.43 | 4.46 | 4.55 |
|                 | f | 0.00      | 0.00 | 0.08 | 0.00 | 0.76 | 0.00          | 0.00 | 0.00 | 0.09 | 0.00 |
| M06-2X          | E | 3.83      | 4.00 | 4.55 | 4.63 | 5.04 | 3.87          | 3.99 | 4.05 | 4.26 | 4.34 |
|                 | f | 0.00      | 0.00 | 0.07 | 0.00 | 0.00 | 0.00          | 0.00 | 0.00 | 0.00 | 0.00 |
| M11             | E | 4.09      | 4.28 | 4.75 | 5.15 | 5.27 | 3.84          | 4.10 | 4.29 | 4.30 | 4.31 |
|                 | f | 0.00      | 0.00 | 0.10 | 0.45 | 0.33 | 0.00          | 0.00 | 0.00 | 0.00 | 0.01 |
| M11-L           | E | 2.09      | 2.28 | 2.30 | 2.48 | 2.50 | 0.66          | 0.83 | 1.17 | 1.38 | 1.54 |
|                 | f | 0.00      | 0.00 | 0.00 | 0.00 | 0.00 | 0.00          | 0.00 | 0.00 | 0.00 | 0.00 |
| CC2             | E | 3.28      | 3.43 | 4.17 | 4.34 | 4.41 | 3.27          | 3.33 | 3.41 | 3.50 | 3.60 |
|                 | f | 0.00      | 0.00 | 0.02 | 0.02 | 0.05 | 0.00          | 0.00 | 0.02 | 0.02 | 0.05 |

Table S17: TDA and CC2 excitation energies (E, in eV) and oscillator strengths (f) for TMpCA<sup>-</sup> with the def2-TZVP and aug-def2-TZVP basis sets.

| molecule        |   | def2-TZVP |      |      |      |      | aug-def2-TZVP |      |      |      |      |
|-----------------|---|-----------|------|------|------|------|---------------|------|------|------|------|
|                 |   | 1a        | 2a   | 3a   | 4a   | 5a   | 1a            | 2a   | 3a   | 4a   | 5a   |
| CIS             | E | 3.98      | 5.16 | 5.66 | 5.79 | 5.91 | 3.76          | 3.89 | 3.95 | 4.17 | 4.38 |
|                 | f | 1.51      | 0.10 | 0.00 | 0.00 | 0.00 | 0.00          | 1.43 | 0.00 | 0.00 | 0.00 |
| B3LYP           | E | 3.30      | 3.63 | 4.05 | 4.23 | 4.31 | 2.97          | 3.30 | 3.41 | 3.49 | 3.53 |
|                 | f | 0.00      | 1.66 | 0.00 | 0.00 | 0.13 | 0.00          | 0.00 | 0.00 | 0.01 | 1.58 |
| BHLYP           | E | 3.72      | 4.34 | 4.69 | 4.87 | 4.93 | 3.63          | 3.64 | 3.77 | 3.88 | 4.23 |
|                 | f | 1.63      | 0.00 | 0.11 | 0.00 | 0.00 | 1.56          | 0.01 | 0.00 | 0.00 | 0.00 |
| CAM-B3LYP       | E | 3.61      | 4.04 | 4.55 | 4.61 | 4.89 | 3.51          | 3.67 | 3.78 | 3.86 | 4.04 |
|                 | f | 1.57      | 0.00 | 0.11 | 0.00 | 0.00 | 1.52          | 0.00 | 0.00 | 0.00 | 0.00 |
| CAMh-B3LYP      | E | 3.61      | 3.82 | 4.48 | 4.50 | 4.63 | 3.45          | 3.52 | 3.59 | 3.71 | 3.82 |
|                 | f | 1.61      | 0.00 | 0.12 | 0.00 | 0.00 | 0.00          | 1.56 | 0.00 | 0.00 | 0.00 |
| BP86            | E | 2.44      | 3.53 | 3.57 | 3.70 | 3.88 | 2.45          | 2.74 | 3.12 | 3.38 | 3.42 |
|                 | f | 0.00      | 0.00 | 1.49 | 0.00 | 0.00 | 0.00          | 0.00 | 0.00 | 0.00 | 0.00 |
| PBE             | E | 2.42      | 3.48 | 3.57 | 3.69 | 3.79 | 2.43          | 2.62 | 2.98 | 3.24 | 3.30 |
|                 | f | 0.00      | 0.00 | 1.48 | 0.00 | 0.00 | 0.00          | 0.00 | 0.00 | 0.00 | 0.00 |
| PBE0            | E | 3.43      | 3.67 | 4.30 | 4.33 | 4.41 | 3.24          | 3.44 | 3.57 | 3.61 | 3.69 |
|                 | f | 0.00      | 1.68 | 0.00 | 0.00 | 0.12 | 0.00          | 0.00 | 1.63 | 0.00 | 0.00 |
| PBE50           | E | 3.74      | 4.29 | 4.73 | 4.84 | 5.07 | 3.66          | 3.85 | 3.98 | 4.08 | 4.29 |
|                 | f | 1.65      | 0.00 | 0.11 | 0.00 | 0.00 | 1.60          | 0.00 | 0.00 | 0.00 | 0.00 |
| $\omega$ PBE    | E | 3.55      | 4.05 | 4.53 | 4.58 | 5.28 | 3.47          | 3.94 | 4.05 | 4.11 | 4.26 |
|                 | f | 1.49      | 0.00 | 0.00 | 0.10 | 0.00 | 1.47          | 0.00 | 0.00 | 0.00 | 0.00 |
| $\omega$ hPBE0  | E | 3.64      | 3.68 | 4.44 | 4.49 | 4.64 | 3.53          | 3.55 | 3.69 | 3.70 | 3.79 |
|                 | f | 1.64      | 0.00 | 0.00 | 0.11 | 0.00 | 0.00          | 1.59 | 0.00 | 0.00 | 0.00 |
| $\omega$ PBEh   | E | 3.59      | 4.00 | 4.56 | 4.56 | 5.11 | 3.51          | 3.76 | 3.91 | 4.00 | 4.03 |
|                 | f | 1.54      | 0.00 | 0.02 | 0.08 | 0.00 | 1.50          | 0.00 | 0.00 | 0.00 | 0.00 |
| BNL             | E | 3.63      | 4.50 | 4.77 | 4.83 | 5.46 | 3.54          | 3.93 | 4.16 | 4.34 | 4.49 |
|                 | f | 1.48      | 0.00 | 0.12 | 0.00 | 0.00 | 1.43          | 0.00 | 0.00 | 0.00 | 0.00 |
| $\omega$ B97X   | E | 3.60      | 4.34 | 4.66 | 4.75 | 5.35 | 3.52          | 4.18 | 4.34 | 4.38 | 4.53 |
|                 | f | 1.49      | 0.00 | 0.11 | 0.00 | 0.00 | 1.45          | 0.00 | 0.00 | 0.00 | 0.00 |
| $\omega$ B97X-D | E | 3.60      | 4.07 | 4.56 | 4.61 | 5.13 | 3.52          | 3.87 | 4.02 | 4.07 | 4.15 |
|                 | f | 1.53      | 0.00 | 0.10 | 0.00 | 0.00 | 1.50          | 0.00 | 0.00 | 0.00 | 0.00 |
| M06-2X          | E | 3.59      | 4.00 | 4.50 | 4.60 | 4.85 | 3.43          | 3.50 | 3.56 | 3.65 | 4.00 |
|                 | f | 1.60      | 0.00 | 0.00 | 0.11 | 0.00 | 0.00          | 1.54 | 0.00 | 0.00 | 0.00 |
| M11             | E | 3.57      | 4.18 | 4.53 | 4.70 | 5.24 | 3.15          | 3.32 | 3.49 | 3.49 | 3.74 |
|                 | f | 1.50      | 0.00 | 0.00 | 0.10 | 0.00 | 0.00          | 0.00 | 0.03 | 1.40 | 0.00 |
| M11-L           | E | 2.97      | 3.41 | 3.65 | 4.18 | 4.20 | 1.49          | 2.10 | 2.17 | 2.22 | 2.25 |
|                 | f | 0.00      | 0.00 | 1.50 | 0.09 | 0.00 | 0.00          | 0.00 | 0.00 | 0.00 | 0.00 |
| CC2             | E | 3.04      | 3.40 | 4.23 | 4.44 | 4.92 | 2.96          | 3.30 | 3.45 | 3.47 | 3.84 |
|                 | f | 1.21      | 0.00 | 0.09 | 0.00 | 0.00 | 1.21          | 0.00 | 0.09 | 0.00 | 0.00 |

**Table S18: TDA and CC2 excitation energies (E, in eV) and oscillator strengths (f) for pCT<sup>-</sup> with the def2-TZVP and aug-def2-TZVP basis sets.**

| molecule        |   | def2-TZVP |      |      |      |      | aug-def2-TZVP |      |      |      |      |
|-----------------|---|-----------|------|------|------|------|---------------|------|------|------|------|
|                 |   | 1a        | 2a   | 3a   | 4a   | 5a   | 1a            | 2a   | 3a   | 4a   | 5a   |
| CIS             | E | 3.96      | 5.17 | 5.60 | 5.61 | 5.79 | 3.84          | 3.89 | 4.04 | 4.30 | 4.45 |
|                 | f | 1.69      | 0.09 | 0.00 | 0.07 | 0.01 | 0.02          | 1.57 | 0.01 | 0.00 | 0.00 |
| B3LYP           | E | 2.97      | 3.18 | 3.25 | 3.60 | 4.19 | 2.94          | 2.98 | 3.15 | 3.26 | 3.37 |
|                 | f | 0.11      | 0.01 | 0.00 | 1.71 | 0.00 | 0.10          | 0.00 | 0.01 | 0.00 | 0.01 |
| BHLYP           | E | 3.68      | 4.14 | 4.29 | 4.49 | 4.71 | 3.62          | 3.72 | 3.84 | 3.98 | 4.04 |
|                 | f | 1.82      | 0.01 | 0.00 | 0.00 | 0.09 | 1.76          | 0.00 | 0.00 | 0.01 | 0.00 |
| CAM-B3LYP       | E | 3.57      | 3.99 | 4.17 | 4.54 | 4.58 | 3.50          | 3.77 | 3.91 | 3.97 | 4.00 |
|                 | f | 1.76      | 0.00 | 0.00 | 0.01 | 0.09 | 1.71          | 0.00 | 0.00 | 0.00 | 0.00 |
| CAMh-B3LYP      | E | 3.54      | 3.76 | 3.81 | 4.09 | 4.50 | 3.48          | 3.56 | 3.67 | 3.74 | 3.83 |
|                 | f | 1.66      | 0.00 | 0.15 | 0.00 | 0.09 | 1.63          | 0.02 | 0.01 | 0.08 | 0.00 |
| BP86            | E | 2.27      | 2.36 | 2.38 | 2.60 | 2.68 | 2.27          | 2.37 | 2.39 | 2.62 | 2.71 |
|                 | f | 0.05      | 0.00 | 0.00 | 0.00 | 0.00 | 0.05          | 0.00 | 0.00 | 0.00 | 0.00 |
| PBE             | E | 2.26      | 2.34 | 2.37 | 2.57 | 2.65 | 2.25          | 2.36 | 2.37 | 2.59 | 2.59 |
|                 | f | 0.05      | 0.00 | 0.00 | 0.00 | 0.00 | 0.05          | 0.00 | 0.00 | 0.00 | 0.00 |
| PBE0            | E | 3.16      | 3.38 | 3.41 | 3.65 | 4.29 | 3.13          | 3.26 | 3.38 | 3.40 | 3.57 |
|                 | f | 0.16      | 0.00 | 0.02 | 1.68 | 0.00 | 0.16          | 0.00 | 0.02 | 0.00 | 1.45 |
| PBE50           | E | 3.70      | 4.16 | 4.23 | 4.51 | 4.76 | 3.64          | 3.94 | 4.04 | 4.09 | 4.19 |
|                 | f | 1.83      | 0.02 | 0.00 | 0.00 | 0.09 | 1.79          | 0.00 | 0.00 | 0.01 | 0.00 |
| $\omega$ PBE    | E | 3.51      | 3.99 | 4.57 | 4.59 | 4.70 | 3.45          | 4.00 | 4.04 | 4.23 | 4.44 |
|                 | f | 1.68      | 0.00 | 0.01 | 0.07 | 0.02 | 1.64          | 0.00 | 0.00 | 0.00 | 0.01 |
| $\omega$ hPBE0  | E | 3.53      | 3.63 | 3.73 | 3.96 | 4.43 | 3.48          | 3.63 | 3.67 | 3.78 | 3.90 |
|                 | f | 1.26      | 0.00 | 0.57 | 0.01 | 0.00 | 1.33          | 0.07 | 0.36 | 0.01 | 0.01 |
| $\omega$ PBEh   | E | 3.56      | 3.94 | 4.42 | 4.58 | 4.60 | 3.50          | 3.86 | 3.95 | 4.04 | 4.23 |
|                 | f | 1.73      | 0.00 | 0.01 | 0.01 | 0.07 | 1.68          | 0.00 | 0.00 | 0.00 | 0.00 |
| BNL             | E | 3.61      | 4.44 | 4.79 | 4.85 | 5.16 | 3.54          | 4.03 | 4.27 | 4.44 | 4.51 |
|                 | f | 1.66      | 0.00 | 0.10 | 0.00 | 0.05 | 1.59          | 0.00 | 0.00 | 0.00 | 0.01 |
| $\omega$ B97X   | E | 3.57      | 4.28 | 4.67 | 4.78 | 4.87 | 3.51          | 4.27 | 4.29 | 4.49 | 4.58 |
|                 | f | 1.67      | 0.00 | 0.09 | 0.00 | 0.02 | 1.62          | 0.00 | 0.00 | 0.00 | 0.10 |
| $\omega$ B97X-D | E | 3.56      | 4.01 | 4.46 | 4.60 | 4.63 | 3.50          | 3.96 | 4.02 | 4.14 | 4.33 |
|                 | f | 1.73      | 0.00 | 0.01 | 0.07 | 0.00 | 1.68          | 0.00 | 0.00 | 0.00 | 0.01 |
| M06-2X          | E | 3.54      | 3.94 | 4.04 | 4.40 | 4.48 | 3.48          | 3.54 | 3.65 | 3.76 | 3.89 |
|                 | f | 1.78      | 0.00 | 0.01 | 0.00 | 0.00 | 1.72          | 0.00 | 0.00 | 0.01 | 0.00 |
| M11             | E | 3.53      | 4.12 | 4.53 | 4.71 | 4.82 | 3.26          | 3.43 | 3.48 | 3.68 | 3.85 |
|                 | f | 1.69      | 0.00 | 0.00 | 0.08 | 0.02 | 0.00          | 0.09 | 1.52 | 0.00 | 0.00 |
| M11-L           | E | 2.46      | 2.56 | 2.90 | 3.16 | 3.55 | 1.47          | 1.86 | 2.11 | 2.18 | 2.35 |
|                 | f | 0.05      | 0.00 | 0.00 | 0.00 | 1.33 | 0.00          | 0.00 | 0.00 | 0.00 | 0.01 |
| CC2             | E | 3.04      | 3.36 | 3.89 | 4.26 | 4.40 | 2.98          | 3.33 | 3.37 | 3.55 | 3.57 |
|                 | f | 1.37      | 0.00 | 0.00 | 0.08 | 0.00 | 1.37          | 0.00 | 0.00 | 0.08 | 0.00 |

**Table S19:** TDA and CC2 excitation energies (E, in eV) and oscillator strengths (f) for p-HBDI<sup>-</sup> with the def2-TZVP and aug-def2-TZVP basis sets.

| molecule        |   | def2-TZVP |      |      |      |      | aug-def2-TZVP |      |      |      |      |
|-----------------|---|-----------|------|------|------|------|---------------|------|------|------|------|
|                 |   | 1a        | 2a   | 3a   | 4a   | 5a   | 1a            | 2a   | 3a   | 4a   | 5a   |
| CIS             | E | 3.78      | 5.19 | 5.59 | 5.63 | 6.18 | 3.35          | 3.59 | 3.70 | 3.73 | 3.85 |
|                 | f | 1.53      | 0.07 | 0.00 | 0.00 | 0.09 | 0.00          | 0.00 | 1.39 | 0.00 | 0.08 |
| B3LYP           | E | 3.21      | 3.49 | 3.73 | 4.16 | 4.29 | 2.46          | 3.00 | 3.15 | 3.28 | 3.40 |
|                 | f | 0.00      | 1.57 | 0.00 | 0.00 | 0.09 | 0.00          | 0.00 | 0.10 | 0.00 | 1.34 |
| BHLYP           | E | 3.55      | 4.25 | 4.54 | 4.71 | 5.17 | 3.03          | 3.47 | 3.53 | 3.62 | 3.68 |
|                 | f | 1.60      | 0.00 | 0.00 | 0.07 | 0.01 | 0.00          | 1.47 | 0.00 | 0.00 | 0.08 |
| CAM-B3LYP       | E | 3.44      | 3.94 | 4.59 | 4.62 | 4.73 | 3.12          | 3.36 | 3.60 | 3.60 | 3.74 |
|                 | f | 1.54      | 0.00 | 0.08 | 0.00 | 0.00 | 0.00          | 1.48 | 0.00 | 0.00 | 0.02 |
| CAMh-B3LYP      | E | 3.45      | 3.72 | 4.32 | 4.50 | 4.55 | 2.88          | 3.36 | 3.38 | 3.49 | 3.54 |
|                 | f | 1.57      | 0.00 | 0.00 | 0.08 | 0.00 | 0.00          | 1.40 | 0.00 | 0.00 | 0.12 |
| BP86            | E | 2.37      | 3.43 | 3.44 | 3.50 | 3.81 | 2.33          | 2.39 | 2.82 | 2.86 | 3.34 |
|                 | f | 0.00      | 0.00 | 1.30 | 0.00 | 0.01 | 0.00          | 0.00 | 0.00 | 0.00 | 0.66 |
| PBE             | E | 2.35      | 3.29 | 3.41 | 3.44 | 3.81 | 2.17          | 2.37 | 2.63 | 2.76 | 3.32 |
|                 | f | 0.00      | 0.00 | 0.00 | 1.30 | 0.01 | 0.00          | 0.00 | 0.00 | 0.00 | 1.05 |
| PBE0            | E | 3.34      | 3.51 | 4.06 | 4.40 | 4.51 | 2.71          | 3.24 | 3.36 | 3.47 | 3.47 |
|                 | f | 0.00      | 1.61 | 0.00 | 0.08 | 0.00 | 0.00          | 0.00 | 0.56 | 0.00 | 0.98 |
| PBE50           | E | 3.57      | 4.19 | 4.75 | 4.84 | 5.09 | 3.25          | 3.50 | 3.73 | 3.81 | 3.87 |
|                 | f | 1.62      | 0.00 | 0.07 | 0.00 | 0.00 | 0.00          | 1.55 | 0.00 | 0.00 | 0.02 |
| $\omega$ PBE    | E | 3.37      | 3.94 | 4.59 | 4.63 | 5.12 | 3.31          | 3.59 | 3.87 | 3.97 | 4.12 |
|                 | f | 1.47      | 0.00 | 0.00 | 0.07 | 0.01 | 1.44          | 0.00 | 0.00 | 0.00 | 0.00 |
| $\omega$ hPBE0  | E | 3.49      | 3.59 | 4.44 | 4.45 | 4.49 | 2.96          | 3.40 | 3.45 | 3.56 | 3.61 |
|                 | f | 1.59      | 0.00 | 0.00 | 0.00 | 0.08 | 0.00          | 1.46 | 0.00 | 0.00 | 0.08 |
| $\omega$ PBEh   | E | 3.42      | 3.89 | 4.60 | 4.60 | 5.00 | 3.35          | 3.36 | 3.68 | 3.75 | 3.90 |
|                 | f | 1.51      | 0.00 | 0.07 | 0.00 | 0.01 | 1.47          | 0.00 | 0.00 | 0.00 | 0.00 |
| BNL             | E | 3.45      | 4.40 | 4.84 | 5.20 | 5.36 | 3.37          | 3.59 | 3.88 | 4.03 | 4.15 |
|                 | f | 1.48      | 0.00 | 0.08 | 0.00 | 0.00 | 1.44          | 0.00 | 0.00 | 0.00 | 0.00 |
| $\omega$ B97X   | E | 3.41      | 4.23 | 4.71 | 4.94 | 5.32 | 3.36          | 3.85 | 4.10 | 4.24 | 4.40 |
|                 | f | 1.47      | 0.00 | 0.07 | 0.00 | 0.01 | 1.44          | 0.00 | 0.00 | 0.00 | 0.00 |
| $\omega$ B97X-D | E | 3.42      | 3.96 | 4.60 | 4.68 | 5.04 | 3.36          | 3.48 | 3.78 | 3.86 | 4.02 |
|                 | f | 1.50      | 0.00 | 0.07 | 0.00 | 0.01 | 1.47          | 0.00 | 0.00 | 0.00 | 0.00 |
| M06-2X          | E | 3.44      | 3.89 | 4.62 | 4.69 | 4.74 | 2.86          | 3.34 | 3.35 | 3.42 | 3.46 |
|                 | f | 1.57      | 0.00 | 0.08 | 0.00 | 0.00 | 0.00          | 0.00 | 1.27 | 0.00 | 0.24 |
| M11             | E | 3.39      | 4.06 | 4.76 | 4.83 | 5.27 | 2.78          | 3.10 | 3.17 | 3.22 | 3.33 |
|                 | f | 1.48      | 0.00 | 0.06 | 0.00 | 0.01 | 0.00          | 0.00 | 0.00 | 0.11 | 1.28 |
| M11-L           | E | 2.88      | 3.10 | 3.47 | 4.03 | 4.08 | 1.02          | 1.49 | 1.61 | 1.84 | 1.96 |
|                 | f | 0.00      | 0.00 | 1.41 | 0.00 | 0.05 | 0.00          | 0.00 | 0.01 | 0.00 | 0.00 |
| CC2             | E | 2.92      | 3.30 | 4.30 | 4.54 | 4.57 | 2.77          | 2.85 | 3.24 | 3.25 | 3.35 |
|                 | f | 1.17      | 0.00 | 0.07 | 0.00 | 0.00 | 1.17          | 0.00 | 0.07 | 0.00 | 0.00 |

**Table S20: TDA and CC2 excitation energies (E, in eV) and oscillator strengths (f) for p-HBDI with the def2-TZVP and aug-def2-TZVP basis sets.**

| molecule        |   | def2-TZVP |      |      |      |      | aug-def2-TZVP |      |      |      |      |
|-----------------|---|-----------|------|------|------|------|---------------|------|------|------|------|
|                 |   | 1a        | 2a   | 3a   | 4a   | 5a   | 1a            | 2a   | 3a   | 4a   | 5a   |
| CIS             | E | 4.38      | 5.51 | 5.76 | 6.05 | 6.87 | 4.35          | 5.42 | 5.44 | 5.75 | 5.76 |
|                 | f | 1.10      | 0.02 | 0.00 | 0.04 | 0.20 | 1.07          | 0.00 | 0.03 | 0.00 | 0.00 |
| B3LYP           | E | 3.67      | 3.74 | 4.22 | 4.30 | 4.89 | 3.66          | 3.71 | 4.20 | 4.27 | 4.61 |
|                 | f | 0.00      | 0.98 | 0.11 | 0.02 | 0.09 | 0.00          | 0.97 | 0.11 | 0.02 | 0.00 |
| BHLYP           | E | 4.03      | 4.53 | 4.86 | 5.06 | 5.83 | 3.99          | 4.52 | 4.82 | 5.03 | 5.21 |
|                 | f | 1.11      | 0.00 | 0.02 | 0.04 | 0.18 | 1.09          | 0.00 | 0.02 | 0.04 | 0.00 |
| CAM-B3LYP       | E | 3.93      | 4.13 | 4.73 | 4.83 | 5.58 | 3.90          | 4.12 | 4.69 | 4.80 | 5.18 |
|                 | f | 1.05      | 0.00 | 0.03 | 0.07 | 0.00 | 1.02          | 0.00 | 0.03 | 0.08 | 0.00 |
| CAMh-B3LYP      | E | 3.87      | 3.99 | 4.59 | 4.66 | 5.43 | 3.84          | 3.97 | 4.56 | 4.63 | 4.99 |
|                 | f | 1.04      | 0.00 | 0.05 | 0.06 | 0.00 | 1.01          | 0.00 | 0.05 | 0.06 | 0.00 |
| BP86            | E | 3.01      | 3.48 | 3.71 | 3.80 | 4.19 | 3.00          | 3.46 | 3.70 | 3.77 | 4.17 |
|                 | f | 0.00      | 0.58 | 0.38 | 0.02 | 0.06 | 0.00          | 0.60 | 0.36 | 0.01 | 0.06 |
| PBE             | E | 2.99      | 3.48 | 3.71 | 3.79 | 4.19 | 2.98          | 3.45 | 3.69 | 3.77 | 4.16 |
|                 | f | 0.00      | 0.57 | 0.40 | 0.02 | 0.05 | 0.00          | 0.59 | 0.37 | 0.01 | 0.06 |
| PBE0            | E | 3.77      | 3.80 | 4.36 | 4.44 | 5.08 | 3.76          | 3.77 | 4.34 | 4.41 | 5.04 |
|                 | f | 0.00      | 1.01 | 0.12 | 0.02 | 0.10 | 0.00          | 0.99 | 0.11 | 0.02 | 0.11 |
| PBE50           | E | 4.04      | 4.48 | 4.89 | 5.05 | 5.86 | 4.01          | 4.47 | 4.86 | 5.03 | 5.45 |
|                 | f | 1.11      | 0.00 | 0.02 | 0.05 | 0.18 | 1.09          | 0.00 | 0.02 | 0.05 | 0.00 |
| $\omega$ PBE    | E | 3.96      | 3.97 | 4.80 | 4.88 | 5.40 | 3.93          | 3.96 | 4.77 | 4.86 | 5.39 |
|                 | f | 1.00      | 0.00 | 0.03 | 0.12 | 0.00 | 0.98          | 0.00 | 0.03 | 0.12 | 0.00 |
| $\omega$ hPBE0  | E | 3.86      | 3.89 | 4.54 | 4.60 | 5.38 | 3.83          | 3.88 | 4.52 | 4.58 | 5.10 |
|                 | f | 1.03      | 0.00 | 0.09 | 0.04 | 0.13 | 1.01          | 0.00 | 0.08 | 0.05 | 0.00 |
| $\omega$ PBEh   | E | 3.93      | 4.00 | 4.74 | 4.82 | 5.47 | 3.90          | 3.99 | 4.71 | 4.80 | 5.35 |
|                 | f | 1.01      | 0.00 | 0.04 | 0.10 | 0.00 | 0.99          | 0.00 | 0.04 | 0.10 | 0.00 |
| BNL             | E | 4.14      | 4.50 | 5.10 | 5.36 | 5.93 | 4.11          | 4.48 | 5.05 | 5.31 | 5.53 |
|                 | f | 1.06      | 0.00 | 0.03 | 0.05 | 0.00 | 1.03          | 0.00 | 0.03 | 0.06 | 0.00 |
| $\omega$ B97X   | E | 4.03      | 4.30 | 4.92 | 5.10 | 5.75 | 4.01          | 4.28 | 4.89 | 5.07 | 5.74 |
|                 | f | 1.03      | 0.00 | 0.02 | 0.08 | 0.00 | 1.01          | 0.00 | 0.03 | 0.08 | 0.00 |
| $\omega$ B97X-D | E | 3.94      | 4.08 | 4.76 | 4.86 | 5.55 | 3.91          | 4.07 | 4.73 | 4.84 | 5.47 |
|                 | f | 1.02      | 0.00 | 0.03 | 0.09 | 0.00 | 1.00          | 0.00 | 0.03 | 0.09 | 0.00 |
| M06-2X          | E | 3.95      | 4.13 | 4.77 | 4.85 | 5.64 | 3.92          | 4.12 | 4.73 | 4.82 | 5.06 |
|                 | f | 1.05      | 0.00 | 0.04 | 0.08 | 0.00 | 1.02          | 0.00 | 0.04 | 0.08 | 0.00 |
| M11             | E | 4.00      | 4.17 | 4.97 | 5.05 | 5.64 | 3.97          | 4.16 | 4.86 | 4.92 | 5.02 |
|                 | f | 1.03      | 0.00 | 0.03 | 0.10 | 0.00 | 1.01          | 0.00 | 0.00 | 0.03 | 0.10 |
| M11-L           | E | 3.56      | 3.63 | 3.96 | 4.04 | 4.41 | 3.22          | 3.28 | 3.55 | 3.59 | 3.91 |
|                 | f | 0.00      | 0.90 | 0.10 | 0.03 | 0.07 | 0.00          | 0.00 | 0.00 | 0.87 | 0.00 |
| CC2             | E | 3.71      | 3.90 | 4.53 | 4.56 | 5.57 | 3.66          | 3.87 | 4.49 | 4.51 | 5.01 |
|                 | f | 0.77      | 0.00 | 0.15 | 0.00 | 0.16 | 0.77          | 0.00 | 0.15 | 0.00 | 0.16 |

**Table S21:** TDA and CC2 excitation energies (E, in eV) and oscillator strengths (f) for p-HBDI<sup>+</sup> with the def2-TZVP and aug-def2-TZVP basis sets.

| molecule        |   | def2-TZVP |      |      |      |      | aug-def2-TZVP |      |      |      |      |
|-----------------|---|-----------|------|------|------|------|---------------|------|------|------|------|
|                 |   | 1a        | 2a   | 3a   | 4a   | 5a   | 1a            | 2a   | 3a   | 4a   | 5a   |
| CIS             | E | 4.00      | 5.20 | 6.08 | 6.71 | 6.72 | 3.98          | 5.18 | 6.05 | 6.17 | 6.61 |
|                 | f | 1.32      | 0.02 | 0.04 | 0.21 | 0.06 | 1.31          | 0.02 | 0.03 | 0.00 | 0.21 |
| B3LYP           | E | 3.61      | 3.76 | 4.02 | 4.25 | 5.12 | 3.59          | 3.74 | 4.01 | 4.23 | 5.03 |
|                 | f | 1.26      | 0.24 | 0.00 | 0.03 | 0.09 | 1.28          | 0.20 | 0.00 | 0.03 | 0.02 |
| BHLYP           | E | 3.74      | 4.35 | 5.01 | 5.11 | 5.77 | 3.72          | 4.34 | 4.99 | 5.10 | 5.71 |
|                 | f | 1.44      | 0.03 | 0.01 | 0.00 | 0.12 | 1.42          | 0.03 | 0.01 | 0.00 | 0.10 |
| CAM-B3LYP       | E | 3.63      | 4.26 | 4.58 | 4.82 | 5.61 | 3.60          | 4.25 | 4.56 | 4.80 | 5.56 |
|                 | f | 1.41      | 0.02 | 0.00 | 0.01 | 0.12 | 1.39          | 0.02 | 0.00 | 0.01 | 0.11 |
| CAMh-B3LYP      | E | 3.62      | 4.10 | 4.39 | 4.63 | 5.45 | 3.60          | 4.08 | 4.38 | 4.62 | 5.40 |
|                 | f | 1.43      | 0.03 | 0.00 | 0.01 | 0.10 | 1.41          | 0.03 | 0.00 | 0.01 | 0.09 |
| BP86            | E | 3.27      | 3.32 | 3.56 | 3.73 | 4.37 | 3.26          | 3.31 | 3.53 | 3.72 | 4.35 |
|                 | f | 0.00      | 0.05 | 1.17 | 0.24 | 0.03 | 0.00          | 0.05 | 1.18 | 0.22 | 0.03 |
| PBE             | E | 3.24      | 3.32 | 3.55 | 3.73 | 4.36 | 3.23          | 3.31 | 3.53 | 3.71 | 4.33 |
|                 | f | 0.00      | 0.05 | 1.16 | 0.25 | 0.03 | 0.00          | 0.05 | 1.17 | 0.22 | 0.03 |
| PBE0            | E | 3.65      | 3.88 | 4.16 | 4.38 | 5.26 | 3.63          | 3.87 | 4.15 | 4.36 | 5.22 |
|                 | f | 1.42      | 0.10 | 0.00 | 0.02 | 0.09 | 1.41          | 0.09 | 0.00 | 0.02 | 0.08 |
| PBE50           | E | 3.75      | 4.38 | 5.01 | 5.06 | 5.80 | 3.73          | 4.37 | 4.99 | 5.05 | 5.75 |
|                 | f | 1.45      | 0.03 | 0.01 | 0.00 | 0.12 | 1.44          | 0.03 | 0.01 | 0.00 | 0.11 |
| $\omega$ PBE    | E | 3.57      | 4.38 | 4.41 | 4.90 | 5.71 | 3.55          | 4.37 | 4.40 | 4.88 | 5.67 |
|                 | f | 1.35      | 0.00 | 0.02 | 0.01 | 0.13 | 1.34          | 0.00 | 0.02 | 0.01 | 0.13 |
| $\omega$ hPBE0  | E | 3.65      | 4.04 | 4.30 | 4.56 | 5.42 | 3.62          | 4.03 | 4.29 | 4.54 | 5.38 |
|                 | f | 1.44      | 0.04 | 0.00 | 0.02 | 0.10 | 1.43          | 0.04 | 0.00 | 0.02 | 0.09 |
| $\omega$ PBEh   | E | 3.62      | 4.27 | 4.42 | 4.80 | 5.62 | 3.60          | 4.26 | 4.41 | 4.78 | 5.58 |
|                 | f | 1.39      | 0.02 | 0.00 | 0.01 | 0.11 | 1.37          | 0.02 | 0.00 | 0.01 | 0.11 |
| BNL             | E | 3.66      | 4.81 | 5.08 | 5.42 | 6.14 | 3.64          | 4.79 | 5.06 | 5.39 | 6.07 |
|                 | f | 1.34      | 0.01 | 0.00 | 0.00 | 0.20 | 1.32          | 0.01 | 0.00 | 0.00 | 0.18 |
| $\omega$ B97X   | E | 3.63      | 4.54 | 4.80 | 5.11 | 5.87 | 3.61          | 4.53 | 4.79 | 5.09 | 5.83 |
|                 | f | 1.34      | 0.02 | 0.00 | 0.00 | 0.15 | 1.33          | 0.02 | 0.00 | 0.01 | 0.14 |
| $\omega$ B97X-D | E | 3.62      | 4.29 | 4.51 | 4.84 | 5.65 | 3.60          | 4.29 | 4.50 | 4.82 | 5.61 |
|                 | f | 1.38      | 0.02 | 0.00 | 0.01 | 0.12 | 1.36          | 0.02 | 0.00 | 0.01 | 0.11 |
| M06-2X          | E | 3.63      | 4.28 | 4.65 | 4.84 | 5.65 | 3.61          | 4.27 | 4.64 | 4.82 | 5.59 |
|                 | f | 1.43      | 0.03 | 0.00 | 0.01 | 0.11 | 1.41          | 0.02 | 0.00 | 0.01 | 0.10 |
| M11             | E | 3.61      | 4.54 | 4.72 | 5.08 | 5.90 | 3.60          | 4.53 | 4.71 | 5.06 | 5.66 |
|                 | f | 1.35      | 0.02 | 0.00 | 0.01 | 0.15 | 1.34          | 0.02 | 0.00 | 0.01 | 0.00 |
| M11-L           | E | 3.49      | 3.64 | 3.89 | 4.00 | 4.61 | 3.48          | 3.62 | 3.74 | 3.88 | 3.99 |
|                 | f | 0.15      | 1.23 | 0.02 | 0.04 | 0.00 | 0.18          | 1.15 | 0.03 | 0.02 | 0.03 |
| CC2             | E | 3.15      | 4.03 | 4.36 | 4.44 | 5.32 | 3.12          | 4.00 | 4.33 | 4.41 | 5.25 |
|                 | f | 1.09      | 0.02 | 0.00 | 0.00 | 0.10 | 1.09          | 0.02 | 0.00 | 0.00 | 0.10 |

**Table S22:** TDA and CC2 excitation energies (E, in eV) and oscillator strengths (f) for PSBT<sup>+</sup> with the def2-TZVP and aug-def2-TZVP basis sets.

| molecule        |   | def2-TZVP |      |      |      |      | aug-def2-TZVP |      |      |      |      |
|-----------------|---|-----------|------|------|------|------|---------------|------|------|------|------|
|                 |   | 1a        | 2a   | 3a   | 4a   | 5a   | 1a            | 2a   | 3a   | 4a   | 5a   |
| CIS             | E | 3.00      | 4.79 | 5.88 | 6.03 | 6.90 | 2.99          | 4.77 | 5.44 | 5.83 | 5.88 |
|                 | f | 2.46      | 0.30 | 0.02 | 0.02 | 0.12 | 2.44          | 0.30 | 0.00 | 0.02 | 0.00 |
| B3LYP           | E | 2.59      | 3.34 | 3.86 | 3.95 | 4.19 | 2.58          | 3.33 | 3.86 | 3.95 | 4.19 |
|                 | f | 2.17      | 1.77 | 0.00 | 0.03 | 0.01 | 2.18          | 1.74 | 0.00 | 0.03 | 0.01 |
| BHLYP           | E | 2.72      | 3.91 | 4.71 | 5.11 | 5.25 | 2.72          | 3.90 | 4.69 | 5.10 | 5.24 |
|                 | f | 2.74      | 0.61 | 0.03 | 0.08 | 0.06 | 2.73          | 0.60 | 0.03 | 0.08 | 0.05 |
| CAM-B3LYP       | E | 2.65      | 3.89 | 4.67 | 4.93 | 5.12 | 2.64          | 3.88 | 4.65 | 4.92 | 5.10 |
|                 | f | 2.65      | 0.58 | 0.02 | 0.01 | 0.10 | 2.63          | 0.57 | 0.03 | 0.01 | 0.09 |
| CAMh-B3LYP      | E | 2.63      | 3.70 | 4.45 | 4.60 | 4.89 | 2.63          | 3.69 | 4.43 | 4.59 | 4.87 |
|                 | f | 2.66      | 0.78 | 0.02 | 0.01 | 0.08 | 2.66          | 0.76 | 0.02 | 0.01 | 0.09 |
| BP86            | E | 2.37      | 2.97 | 3.11 | 3.20 | 3.31 | 2.37          | 2.96 | 3.10 | 3.20 | 3.31 |
|                 | f | 0.93      | 0.03 | 3.10 | 0.11 | 0.06 | 2.37          | 2.96 | 3.10 | 3.20 | 3.31 |
| PBE             | E | 2.37      | 2.95 | 3.11 | 3.19 | 3.29 | 2.36          | 2.94 | 3.10 | 3.18 | 3.29 |
|                 | f | 0.92      | 0.02 | 3.00 | 0.22 | 0.05 | 0.93          | 0.02 | 3.04 | 0.16 | 0.05 |
| PBE0            | E | 2.62      | 3.42 | 4.00 | 4.09 | 4.34 | 2.61          | 3.41 | 3.99 | 4.08 | 4.33 |
|                 | f | 2.39      | 1.48 | 0.00 | 0.02 | 0.01 | 2.39          | 1.46 | 0.00 | 0.02 | 0.01 |
| PBE50           | E | 2.72      | 3.91 | 4.72 | 5.06 | 5.20 | 2.72          | 3.90 | 4.70 | 5.05 | 5.19 |
|                 | f | 2.75      | 0.64 | 0.03 | 0.03 | 0.11 | 2.74          | 0.63 | 0.03 | 0.04 | 0.10 |
| $\omega$ PBE    | E | 2.61      | 4.08 | 4.97 | 5.11 | 5.28 | 2.61          | 4.08 | 4.96 | 5.10 | 5.26 |
|                 | f | 2.48      | 0.43 | 0.03 | 0.01 | 0.05 | 2.48          | 0.42 | 0.03 | 0.01 | 0.04 |
| $\omega$ hPBE0  | E | 2.64      | 3.63 | 4.36 | 4.41 | 4.72 | 2.63          | 3.62 | 4.35 | 4.40 | 4.72 |
|                 | f | 2.65      | 0.91 | 0.01 | 0.01 | 0.02 | 2.66          | 0.89 | 0.01 | 0.01 | 0.02 |
| $\omega$ PBEh   | E | 2.63      | 3.99 | 4.79 | 4.96 | 5.18 | 2.62          | 3.98 | 4.78 | 4.95 | 5.16 |
|                 | f | 2.60      | 0.51 | 0.02 | 0.01 | 0.07 | 2.59          | 0.50 | 0.02 | 0.01 | 0.07 |
| BNL             | E | 2.72      | 4.37 | 5.42 | 5.57 | 5.83 | 2.71          | 4.36 | 5.39 | 5.54 | 5.56 |
|                 | f | 2.44      | 0.33 | 0.04 | 0.02 | 0.00 | 2.43          | 0.32 | 0.04 | 0.02 | 0.00 |
| $\omega$ B97X   | E | 2.67      | 4.21 | 5.11 | 5.35 | 5.52 | 2.66          | 4.20 | 5.09 | 5.34 | 5.52 |
|                 | f | 2.49      | 0.39 | 0.03 | 0.03 | 0.01 | 2.48          | 0.38 | 0.03 | 0.03 | 0.01 |
| $\omega$ B97X-D | E | 2.64      | 4.02 | 4.82 | 5.05 | 5.22 | 2.63          | 4.01 | 4.80 | 5.04 | 5.21 |
|                 | f | 2.59      | 0.49 | 0.02 | 0.01 | 0.07 | 2.58          | 0.48 | 0.02 | 0.01 | 0.06 |
| M06-2X          | E | 2.62      | 3.81 | 4.62 | 4.70 | 5.01 | 2.61          | 3.80 | 4.60 | 4.70 | 4.99 |
|                 | f | 2.67      | 0.66 | 0.02 | 0.01 | 0.08 | 2.67          | 0.65 | 0.02 | 0.01 | 0.08 |
| M11             | E | 2.64      | 4.16 | 5.07 | 5.23 | 5.37 | 2.64          | 4.15 | 4.86 | 5.04 | 5.19 |
|                 | f | 2.52      | 0.40 | 0.04 | 0.01 | 0.04 | 2.50          | 0.39 | 0.00 | 0.04 | 0.00 |
| M11-L           | E | 2.45      | 3.14 | 3.35 | 3.52 | 3.65 | 2.44          | 3.12 | 3.35 | 3.51 | 3.58 |
|                 | f | 1.10      | 2.94 | 0.01 | 0.08 | 0.03 | 1.11          | 2.88 | 0.01 | 0.08 | 0.00 |
| CC2             | E | 2.17      | 3.35 | 4.22 | 4.54 | 4.73 | 2.16          | 3.34 | 4.20 | 4.52 | 4.70 |
|                 | f | 1.92      | 0.50 | 0.10 | 0.01 | 0.05 | 1.92          | 0.50 | 0.10 | 0.01 | 0.05 |

**Table S23:** TDA and CC2 excitation energies (**E**, in eV) and oscillator strengths (**f**) for PSB11Me<sub>2</sub><sup>+</sup> with the def2-TZVP and aug-def2-TZVP basis sets.

| molecule        |   | def2-TZVP |      |      |      |      | aug-def2-TZVP |      |      |      |      |
|-----------------|---|-----------|------|------|------|------|---------------|------|------|------|------|
|                 |   | 1a        | 2a   | 3a   | 4a   | 5a   | 1a            | 2a   | 3a   | 4a   | 5a   |
| CIS             | E | 2.98      | 4.73 | 5.77 | 5.98 | 6.85 | 2.97          | 4.71 | 5.47 | 5.70 | 5.87 |
|                 | f | 2.09      | 0.48 | 0.11 | 0.01 | 0.18 | 2.08          | 0.47 | 0.00 | 0.11 | 0.00 |
| B3LYP           | E | 2.56      | 3.30 | 3.87 | 3.92 | 4.19 | 2.55          | 3.29 | 3.86 | 3.92 | 4.18 |
|                 | f | 1.82      | 1.46 | 0.01 | 0.05 | 0.02 | 1.82          | 1.43 | 0.01 | 0.05 | 0.02 |
| BHLYP           | E | 2.69      | 3.89 | 4.63 | 5.08 | 5.23 | 2.69          | 3.88 | 4.60 | 5.06 | 5.21 |
|                 | f | 2.28      | 0.58 | 0.20 | 0.12 | 0.03 | 2.27          | 0.58 | 0.20 | 0.11 | 0.00 |
| CAM-B3LYP       | E | 2.62      | 3.87 | 4.59 | 4.92 | 5.08 | 2.60          | 3.85 | 4.56 | 4.91 | 5.06 |
|                 | f | 2.21      | 0.57 | 0.17 | 0.03 | 0.10 | 2.19          | 0.56 | 0.17 | 0.02 | 0.08 |
| CAMh-B3LYP      | E | 2.60      | 3.67 | 4.38 | 4.60 | 4.86 | 2.59          | 3.66 | 4.36 | 4.60 | 4.84 |
|                 | f | 2.21      | 0.70 | 0.14 | 0.01 | 0.17 | 2.20          | 0.69 | 0.15 | 0.01 | 0.17 |
| BP86            | E | 2.35      | 2.97 | 3.07 | 3.19 | 3.30 | 2.34          | 2.97 | 3.06 | 3.19 | 3.30 |
|                 | f | 0.78      | 0.04 | 2.64 | 0.02 | 0.04 | 0.78          | 0.04 | 2.62 | 0.02 | 0.04 |
| PBE             | E | 2.34      | 2.95 | 3.07 | 3.18 | 3.28 | 2.34          | 2.95 | 3.06 | 3.18 | 3.28 |
|                 | f | 0.78      | 0.03 | 2.63 | 0.05 | 0.04 | 0.78          | 0.03 | 2.61 | 0.04 | 0.03 |
| PBE0            | E | 2.59      | 3.39 | 4.00 | 4.06 | 4.33 | 2.58          | 3.38 | 4.00 | 4.05 | 4.33 |
|                 | f | 1.99      | 1.23 | 0.01 | 0.06 | 0.03 | 1.98          | 1.21 | 0.01 | 0.06 | 0.03 |
| PBE50           | E | 2.69      | 3.88 | 4.64 | 5.04 | 5.17 | 2.69          | 3.88 | 4.62 | 5.03 | 5.16 |
|                 | f | 2.28      | 0.60 | 0.19 | 0.07 | 0.08 | 2.27          | 0.59 | 0.20 | 0.07 | 0.07 |
| $\omega$ PBE    | E | 2.58      | 4.05 | 4.88 | 5.09 | 5.24 | 2.58          | 4.04 | 4.85 | 5.08 | 5.22 |
|                 | f | 2.08      | 0.49 | 0.15 | 0.01 | 0.05 | 2.08          | 0.48 | 0.16 | 0.01 | 0.04 |
| $\omega$ hPBE0  | E | 2.61      | 3.60 | 4.30 | 4.40 | 4.71 | 2.60          | 3.59 | 4.29 | 4.40 | 4.70 |
|                 | f | 2.20      | 0.80 | 0.10 | 0.01 | 0.08 | 2.19          | 0.78 | 0.11 | 0.01 | 0.09 |
| $\omega$ PBEh   | E | 2.60      | 3.96 | 4.70 | 4.95 | 5.13 | 2.59          | 3.95 | 4.68 | 4.94 | 5.11 |
|                 | f | 2.17      | 0.54 | 0.15 | 0.01 | 0.09 | 2.16          | 0.53 | 0.15 | 0.01 | 0.08 |
| BNL             | E | 2.70      | 4.34 | 5.31 | 5.53 | 5.80 | 2.69          | 4.32 | 5.27 | 5.51 | 5.55 |
|                 | f | 2.07      | 0.45 | 0.17 | 0.01 | 0.00 | 2.06          | 0.44 | 0.17 | 0.00 | 0.00 |
| $\omega$ B97X   | E | 2.64      | 4.17 | 5.01 | 5.32 | 5.50 | 2.63          | 4.16 | 4.99 | 5.30 | 5.49 |
|                 | f | 2.09      | 0.47 | 0.16 | 0.02 | 0.01 | 2.08          | 0.47 | 0.16 | 0.02 | 0.01 |
| $\omega$ B97X-D | E | 2.61      | 3.99 | 4.72 | 5.03 | 5.18 | 2.60          | 3.98 | 4.70 | 5.03 | 5.17 |
|                 | f | 2.17      | 0.52 | 0.15 | 0.02 | 0.07 | 2.16          | 0.52 | 0.16 | 0.02 | 0.06 |
| M06-2X          | E | 2.59      | 3.79 | 4.55 | 4.71 | 4.98 | 2.59          | 3.78 | 4.52 | 4.70 | 4.96 |
|                 | f | 2.23      | 0.62 | 0.15 | 0.01 | 0.13 | 2.21          | 0.61 | 0.16 | 0.01 | 0.12 |
| M11             | E | 2.61      | 4.12 | 4.97 | 5.21 | 5.34 | 2.61          | 4.12 | 4.90 | 4.93 | 5.20 |
|                 | f | 2.12      | 0.48 | 0.16 | 0.01 | 0.03 | 2.10          | 0.47 | 0.00 | 0.16 | 0.01 |
| M11-L           | E | 2.43      | 3.08 | 3.35 | 3.50 | 3.64 | 2.42          | 3.07 | 3.35 | 3.49 | 3.52 |
|                 | f | 0.91      | 2.43 | 0.00 | 0.08 | 0.02 | 0.93          | 2.38 | 0.00 | 0.08 | 0.00 |
| CC2             | E | 2.17      | 3.34 | 4.16 | 4.53 | 4.70 | 2.16          | 3.32 | 4.14 | 4.51 | 4.68 |
|                 | f | 1.56      | 0.47 | 0.15 | 0.06 | 0.07 | 1.56          | 0.47 | 0.15 | 0.06 | 0.07 |



**Table S24: TDDFT excitation energies (in eV) for pVP using mixed basis sets: aug-def2-TZVP on hydrogens and def2-TZVP on other atoms (C, N, O, S).**

| Functional      | 1a   | 2a   | 3a   | 4a   | 5a   |
|-----------------|------|------|------|------|------|
| B3LYP           | 4.44 | 4.76 | 4.78 | 5.21 | 5.43 |
| CAM-B3LYP       | 4.67 | 5.00 | 5.28 | 5.65 | 5.90 |
| CAMh-B3LYP      | 4.60 | 4.93 | 5.11 | 5.49 | 5.73 |
| PBE0            | 4.54 | 4.87 | 5.07 | 5.47 | 5.70 |
| $\omega$ hPBE0  | 4.62 | 4.94 | 5.25 | 5.61 | 5.84 |
| $\omega$ PBEh   | 4.70 | 5.03 | 5.46 | 5.80 | 6.03 |
| $\omega$ B97X-D | 4.71 | 5.02 | 5.60 | 5.92 | 6.17 |
| M06-2X          | 4.74 | 5.08 | 5.22 | 5.58 | 5.79 |

**Table S25: TDDFT excitation energies (in eV) for pCA using mixed basis sets: aug-def2-TZVP on hydrogens and def2-TZVP on other atoms (C, N, O, S).**

| Functional      | 1a   | 2a   | 3a   | 4a   | 5a   |
|-----------------|------|------|------|------|------|
| B3LYP           | 4.11 | 4.46 | 4.52 | 5.01 | 5.23 |
| CAM-B3LYP       | 4.36 | 4.81 | 4.97 | 5.50 | 5.86 |
| CAMh-B3LYP      | 4.28 | 4.73 | 4.83 | 5.34 | 5.67 |
| PBE0            | 4.20 | 4.59 | 4.63 | 5.31 | 5.39 |
| $\omega$ hPBE0  | 4.29 | 4.73 | 4.74 | 5.48 | 5.60 |
| $\omega$ PBEh   | 4.40 | 4.82 | 4.87 | 5.69 | 5.89 |
| $\omega$ B97X-D | 4.40 | 4.83 | 4.94 | 5.84 | 5.90 |
| M06-2X          | 4.41 | 4.88 | 4.95 | 5.46 | 5.90 |

**Table S26: TDDFT excitation energies (in eV) for pCA<sup>-</sup> using mixed basis sets: aug-def2-TZVP on hydrogens and def2-TZVP on other atoms (C, N, O, S).**

| Functional      | 1a   | 2a   | 3a   | 4a   | 5a   |
|-----------------|------|------|------|------|------|
| B3LYP           | 3.17 | 3.41 | 3.41 | 3.60 | 3.70 |
| CAM-B3LYP       | 3.47 | 3.73 | 3.97 | 4.04 | 4.13 |
| CAMh-B3LYP      | 3.45 | 3.55 | 3.81 | 3.90 | 3.92 |
| PBE0            | 3.44 | 3.46 | 3.55 | 3.80 | 3.90 |
| $\omega$ hPBE0  | 3.47 | 3.67 | 3.79 | 3.92 | 4.00 |
| $\omega$ PBEh   | 3.48 | 3.88 | 4.09 | 4.11 | 4.24 |
| $\omega$ B97X-D | 3.48 | 4.00 | 4.16 | 4.25 | 4.41 |
| M06-2X          | 3.44 | 3.52 | 3.76 | 3.82 | 4.05 |

**Table S27: TDDFT excitation energies (in eV) for pCA<sup>''-</sup> using mixed basis sets: aug-def2-TZVP on hydrogens and def2-TZVP on other atoms (C, N, O, S).**

| Functional      | 1a   | 2a   | 3a   | 4a   | 5a   |
|-----------------|------|------|------|------|------|
| B3LYP           | 2.64 | 2.67 | 2.80 | 2.81 | 3.05 |
| CAM-B3LYP       | 3.72 | 3.73 | 4.16 | 4.31 | 4.33 |
| CAMh-B3LYP      | 3.40 | 3.45 | 3.75 | 3.88 | 3.92 |
| PBE0            | 2.90 | 2.99 | 3.09 | 3.22 | 3.40 |
| $\omega$ hPBE0  | 3.24 | 3.29 | 3.73 | 3.84 | 3.90 |
| $\omega$ PBEh   | 3.61 | 3.64 | 4.33 | 4.38 | 4.41 |
| $\omega$ B97X-D | 3.71 | 3.74 | 4.35 | 4.50 | 4.54 |
| M06-2X          | 3.80 | 3.99 | 4.05 | 4.34 | 4.38 |

**Table S28: TDDFT excitation energies (in eV) for TMpCA<sup>-</sup> at a mixed basis sets: aug-def2-TZVP on hydrogens and def2-TZVP on other atoms (C, N, O, S).**

| Functional      | 1a   | 2a   | 3a   | 4a   | 5a   |
|-----------------|------|------|------|------|------|
| B3LYP           | 3.06 | 3.26 | 3.30 | 3.61 | 3.71 |
| CAM-B3LYP       | 3.30 | 3.82 | 3.95 | 4.04 | 4.07 |
| CAMh-B3LYP      | 3.29 | 3.59 | 3.79 | 3.81 | 3.93 |
| PBE0            | 3.29 | 3.35 | 3.43 | 3.81 | 3.92 |
| $\omega$ hPBE0  | 3.30 | 3.68 | 3.68 | 3.91 | 4.04 |
| $\omega$ PBEh   | 3.31 | 3.98 | 3.99 | 4.17 | 4.29 |
| $\omega$ B97X-D | 3.31 | 4.06 | 4.09 | 4.30 | 4.43 |
| M06-2X          | 3.27 | 3.58 | 3.74 | 3.85 | 3.96 |

**Table S29: TDDFT excitation energies (in eV) for pCT<sup>-</sup> using mixed basis sets: aug-def2-TZVP on hydrogens and def2-TZVP on other atoms (C, N, O, S).**

| Functional      | 1a   | 2a   | 3a   | 4a   | 5a   |
|-----------------|------|------|------|------|------|
| B3LYP           | 2.94 | 3.11 | 3.18 | 3.25 | 3.26 |
| CAM-B3LYP       | 3.29 | 3.92 | 3.98 | 4.10 | 4.15 |
| CAMh-B3LYP      | 3.26 | 3.72 | 3.77 | 3.77 | 3.88 |
| PBE0            | 3.11 | 3.31 | 3.38 | 3.38 | 3.45 |
| $\omega$ hPBE0  | 3.27 | 3.63 | 3.64 | 3.84 | 3.94 |
| $\omega$ PBEh   | 3.29 | 3.93 | 4.07 | 4.28 | 4.38 |
| $\omega$ B97X-D | 3.29 | 4.01 | 4.18 | 4.36 | 4.44 |
| M06-2X          | 3.25 | 3.72 | 3.84 | 3.90 | 3.93 |

**Table S30: TDDFT excitation energies (in eV) for p-HBDI<sup>-</sup> at a mixed basis sets: aug-def2-TZVP on hydrogens and def2-TZVP on other atoms (C, N, O, S).**

| Functional      | 1a   | 2a   | 3a   | 4a   | 5a   |
|-----------------|------|------|------|------|------|
| B3LYP           | 2.57 | 3.04 | 3.19 | 3.21 | 3.33 |
| CAM-B3LYP       | 3.12 | 3.25 | 3.80 | 3.84 | 3.87 |
| CAMh-B3LYP      | 3.01 | 3.10 | 3.59 | 3.67 | 3.72 |
| PBE0            | 2.82 | 3.09 | 3.34 | 3.44 | 3.55 |
| $\omega$ hPBE0  | 3.10 | 3.11 | 3.68 | 3.75 | 3.83 |
| $\omega$ PBEh   | 3.11 | 3.55 | 3.88 | 3.96 | 4.04 |
| $\omega$ B97X-D | 3.12 | 3.70 | 3.96 | 4.09 | 4.20 |
| M06-2X          | 2.97 | 3.09 | 3.50 | 3.54 | 3.63 |

**Table S31: TDDFT excitation energies (in eV) for p-HBDI using mixed basis sets: aug-def2-TZVP on hydrogens and def2-TZVP on other atoms (C, N, O, S).**

| Functional      | 1a   | 2a   | 3a   | 4a   | 5a   |
|-----------------|------|------|------|------|------|
| B3LYP           | 3.43 | 3.66 | 4.16 | 4.26 | 4.64 |
| CAM-B3LYP       | 3.66 | 4.11 | 4.66 | 4.72 | 5.22 |
| CAMh-B3LYP      | 3.58 | 3.96 | 4.52 | 4.57 | 5.03 |
| PBE0            | 3.50 | 3.75 | 4.29 | 4.39 | 4.92 |
| $\omega$ hPBE0  | 3.57 | 3.87 | 4.48 | 4.54 | 5.15 |
| $\omega$ PBEh   | 3.66 | 3.98 | 4.67 | 4.71 | 5.43 |
| $\omega$ B97X-D | 3.67 | 4.05 | 4.69 | 4.75 | 5.52 |
| M06-2X          | 3.66 | 4.08 | 4.70 | 4.74 | 5.11 |

Table S32: Experimental excitation energies are compared to VEEs obtained at the TDDFT level with aug-def2-TZVP basis sets. The VEEs that deviate by less than 0.25 eV from the experimental absorption maxima are marked in bold font. <sup>a</sup> Measured in solvent, <sup>b</sup> extrapolated to vacuum from solvent measurements, <sup>c</sup> absorption maxima in protein environment. CC2 *ext.* refers to CC2 values obtained at extrapolated QZVP + aug level.

| Method/Molecule | pVP               | pCA               | pCA <sup>-</sup> | pCA' <sup>-a</sup> | TMpCA <sup>-c</sup> | pCT <sup>-</sup> | pHBDI <sup>-</sup> | pHBDI <sup>b</sup> | pHBDI <sup>+</sup> | PSBT <sup>+</sup> | PSBIIMe <sub>2</sub> <sup>+</sup> |
|-----------------|-------------------|-------------------|------------------|--------------------|---------------------|------------------|--------------------|--------------------|--------------------|-------------------|-----------------------------------|
| Exp.            | 4.12/4.75         | 4.04/4.37         | 2.88             | 4.36               | 2.78                | 2.70             | 2.59/2.76          | 3.51               | 2.84/2.99          | 2.00/3.22         | 2.03/3.18                         |
| CC2 ext.        | 4.53/ <b>4.76</b> | <b>4.39</b> /4.68 | 3.19             | 3.28               | <b>2.91</b>         | <b>2.94</b>      | <b>2.73</b>        | <b>3.63</b>        | <b>3.10</b>        | <b>2.14/3.32</b>  | <b>2.15/3.30</b>                  |
| CC2 aug-TZVP    | <b>4.58</b> /5.11 | 4.44/4.72         | 3.25             | 3.27               | <b>2.96</b>         | <b>2.98</b>      | <b>2.77</b>        | <b>3.66</b>        | <b>3.12</b>        | <b>2.16/3.34</b>  | <b>2.16/3.32</b>                  |
| RPA             | 4.93/5.30         | 4.68/5.34         | 3.68             | <b>4.51</b>        | 3.68                | 3.68             | 3.35               | 4.10               | 3.74               | 2.77/4.49         | 2.76/4.44                         |
| B3LYP           | 4.41/ <b>4.72</b> | <b>4.09/4.46</b>  | <b>3.05</b>      | 2.65               | <b>2.97</b>         | <b>2.92</b>      | <b>2.46</b>        | <b>3.42</b>        | <b>3.24</b>        | 2.28/ <b>3.11</b> | <b>2.26/3.08</b>                  |
| BHLYP           | 4.74/5.04         | 4.42/4.94         | 3.54             | <b>4.11</b>        | 3.38                | 3.38             | 3.03               | <b>3.74</b>        | 3.44               | 2.48/3.71         | 2.46/3.69                         |
| CAM-B3LYP       | 4.64/ <b>4.95</b> | 4.34/4.79         | 3.42             | 3.77               | 3.27                | 3.26             | 3.09               | <b>3.64</b>        | 3.32               | 2.41/3.67         | 2.39/3.64                         |
| CAMh-B3LYP      | 4.57/ <b>4.88</b> | <b>4.26</b> /4.71 | 3.40             | 3.45               | 3.25                | 3.23             | <b>2.88</b>        | <b>3.57</b>        | 3.30               | 2.37/3.49         | 2.35/3.47                         |
| BP86            | <b>4.13</b> /4.46 | 3.68/3.81         | 2.57             | 1.55               | 2.45                | 2.26             | 2.33               | 3.00               | <b>3.08</b>        | <b>2.10/2.73</b>  | <b>2.08/2.70</b>                  |
| PBE             | <b>4.11</b> /4.45 | 3.66/3.80         | 2.55             | 1.39               | 2.43                | 2.24             | 2.17               | 2.98               | <b>3.08</b>        | <b>2.09/2.72</b>  | <b>2.08/2.70</b>                  |
| PBE0            | 4.51/ <b>4.82</b> | <b>4.18/4.58</b>  | 3.29             | 2.95               | 3.24                | 3.10             | <b>2.71</b>        | <b>3.49</b>        | 3.29               | 2.31/ <b>3.21</b> | 2.29/ <b>3.18</b>                 |
| PBE50           | 4.79/5.10         | 4.46/4.98         | 3.57             | 4.06               | 3.40                | 3.40             | 3.22               | <b>3.76</b>        | 3.45               | 2.48/3.71         | 2.46/3.68                         |
| $\omega$ PBE    | 4.69/5.03         | 4.43/4.81         | 3.41             | 3.72               | 3.24                | 3.23             | 3.05               | <b>3.67</b>        | 3.29               | 2.41/3.82         | 2.38/3.78                         |
| $\omega$ hPBE0  | 4.59/ <b>4.90</b> | <b>4.27</b> /4.71 | 3.43             | 3.29               | 3.27                | 3.25             | <b>2.96</b>        | <b>3.55</b>        | 3.31               | 2.37/ <b>3.43</b> | 2.34/ <b>3.41</b>                 |
| $\omega$ PBEh   | 4.67/ <b>4.98</b> | 4.38/4.80         | 3.44             | 3.65               | 3.27                | 3.26             | 3.09               | <b>3.64</b>        | 3.32               | 2.42/3.75         | 2.39/3.71                         |
| BNL             | 4.82/5.15         | 4.57/5.02         | 3.49             | <b>4.47</b>        | 3.33                | 3.34             | 3.15               | 3.87               | 3.41               | 2.53/4.10         | 2.51/4.06                         |
| $\omega$ B97X   | 4.76/5.08         | 4.48/4.91         | 3.47             | <b>4.12</b>        | 3.31                | 3.29             | 3.11               | <b>3.76</b>        | 3.36               | 2.47/3.94         | 2.45/3.90                         |
| $\omega$ B97X-D | 4.68/ <b>4.99</b> | 4.38/4.82         | 3.44             | 3.75               | 3.28                | 3.27             | 3.09               | <b>3.66</b>        | 3.33               | 2.43/3.77         | 2.40/3.74                         |
| M06-2X          | 4.70/5.03         | 4.39/4.86         | 3.37             | 3.83               | 3.24                | 3.23             | <b>2.86</b>        | <b>3.65</b>        | 3.31               | 2.37/3.59         | 2.35/3.57                         |
| M11             | 4.77/ <b>4.96</b> | 4.47/4.96         | <b>3.06</b>      | 3.84               | 3.15                | 3.25             | <b>2.78</b>        | <b>3.71</b>        | 3.33               | 2.44/3.88         | 2.41/3.84                         |
| M11-L           | 3.50/3.93         | 3.75/3.99         | 1.60             | 0.65               | 1.49                | 1.47             | 1.02               | 3.22               | <b>3.20</b>        | <b>2.19/2.82</b>  | <b>2.18/2.78</b>                  |

Table S33: The root mean square (RMS) and mean signed average (MSA) values (in eV) of the TDDFT and TDA excitation energies calculated with the def2-TZVP basis set relative to the CC2 values. “Five States” compares the excitation energies of all five states. “First State” compares the excitation energies of only the lowest excited states. “Relative VEEs” compares the gaps,  $VEE(n)-VEE(0)$ , between different excited states.

| Functional      | Five States |       |      |       |       |       | First State |       |       |       |      |       | Relative VEEs |       |      |       |       |       |      |       |
|-----------------|-------------|-------|------|-------|-------|-------|-------------|-------|-------|-------|------|-------|---------------|-------|------|-------|-------|-------|------|-------|
|                 | TDDFT       |       | TDA  |       | TDDFT |       | TDA         |       | TDDFT |       | TDA  |       | TDDFT         |       | TDA  |       | TDDFT |       | TDA  |       |
|                 | RMS         | MSA   | RMS  | MSA   | RMS   | MSA   | RMS         | MSA   | RMS   | MSA   | RMS  | MSA   | RMS           | MSA   | RMS  | MSA   | RMS   | MSA   | RMS  | MSA   |
| CIS/RPA         | 1.24        | 1.13  | 1.41 | 1.33  | 0.72  | 0.65  | 0.94        | 0.89  | 0.72  | 0.60  | 0.94 | 0.89  | 0.72          | 0.60  | 0.72 | 0.60  | 0.68  | 0.56  | 0.68 | 0.56  |
| B3LYP           | 0.51        | -0.39 | 0.47 | -0.29 | 0.27  | -0.06 | 0.32        | 0.09  | 0.27  | -0.41 | 0.32 | 0.09  | 0.48          | -0.41 | 0.48 | -0.41 | 0.56  | -0.48 | 0.56 | -0.48 |
| BHLYP           | 0.44        | 0.34  | 0.53 | 0.47  | 0.37  | 0.31  | 0.57        | 0.54  | 0.37  | 0.04  | 0.57 | 0.54  | 0.28          | 0.04  | 0.28 | 0.04  | 0.25  | -0.08 | 0.25 | -0.08 |
| CAM-B3LYP       | 0.28        | 0.18  | 0.38 | 0.31  | 0.24  | 0.19  | 0.44        | 0.41  | 0.24  | -0.00 | 0.44 | 0.41  | 0.20          | -0.00 | 0.20 | -0.00 | 0.22  | -0.13 | 0.22 | -0.13 |
| CAMh-B3LYP      | 0.21        | 0.01  | 0.27 | 0.13  | 0.19  | 0.12  | 0.41        | 0.36  | 0.19  | -0.13 | 0.41 | 0.36  | 0.23          | -0.13 | 0.23 | -0.13 | 0.35  | -0.28 | 0.35 | -0.28 |
| BP86            | 1.14        | -1.01 | 1.09 | -0.91 | 0.77  | -0.61 | 0.77        | -0.53 | 0.77  | -0.50 | 0.77 | -0.53 | 0.69          | -0.50 | 0.69 | -0.50 | 0.76  | -0.47 | 0.76 | -0.47 |
| PBE             | 1.17        | -1.03 | 1.10 | -0.92 | 0.79  | -0.62 | 0.78        | -0.55 | 0.79  | -0.62 | 0.78 | -0.55 | 0.70          | -0.51 | 0.70 | -0.51 | 0.75  | -0.46 | 0.75 | -0.46 |
| PBE0            | 0.38        | -0.25 | 0.36 | -0.14 | 0.22  | 0.03  | 0.33        | 0.21  | 0.22  | 0.03  | 0.33 | 0.21  | 0.41          | -0.34 | 0.41 | -0.34 | 0.50  | -0.43 | 0.50 | -0.43 |
| PBE50           | 0.43        | 0.36  | 0.53 | 0.49  | 0.37  | 0.32  | 0.58        | 0.55  | 0.37  | 0.32  | 0.58 | 0.55  | 0.25          | 0.05  | 0.25 | 0.05  | 0.21  | -0.07 | 0.21 | -0.07 |
| $\omega$ PBE    | 0.33        | 0.25  | 0.44 | 0.38  | 0.21  | 0.18  | 0.40        | 0.38  | 0.21  | 0.18  | 0.40 | 0.38  | 0.22          | 0.09  | 0.22 | 0.09  | 0.21  | -0.00 | 0.21 | -0.00 |
| $\omega$ hPBE0  | 0.21        | -0.04 | 0.26 | 0.07  | 0.20  | 0.11  | 0.42        | 0.35  | 0.20  | 0.11  | 0.42 | 0.35  | 0.26          | -0.19 | 0.26 | -0.19 | 0.41  | -0.35 | 0.41 | -0.35 |
| $\omega$ PBEh   | 0.29        | 0.19  | 0.38 | 0.32  | 0.22  | 0.18  | 0.42        | 0.39  | 0.22  | 0.18  | 0.42 | 0.39  | 0.18          | 0.02  | 0.18 | 0.02  | 0.20  | -0.09 | 0.20 | -0.09 |
| BNL             | 0.68        | 0.59  | 0.80 | 0.74  | 0.45  | 0.37  | 0.60        | 0.57  | 0.45  | 0.37  | 0.60 | 0.57  | 0.44          | 0.28  | 0.44 | 0.28  | 0.36  | 0.22  | 0.36 | 0.22  |
| $\omega$ B97X   | 0.50        | 0.42  | 0.61 | 0.56  | 0.33  | 0.27  | 0.50        | 0.47  | 0.33  | 0.27  | 0.50 | 0.47  | 0.32          | 0.18  | 0.32 | 0.18  | 0.25  | 0.10  | 0.25 | 0.10  |
| $\omega$ B97X-D | 0.31        | 0.23  | 0.42 | 0.36  | 0.24  | 0.19  | 0.43        | 0.41  | 0.24  | 0.19  | 0.43 | 0.41  | 0.19          | 0.05  | 0.19 | 0.05  | 0.19  | -0.06 | 0.19 | -0.06 |
| M06-2X          | 0.27        | 0.18  | 0.37 | 0.31  | 0.23  | 0.18  | 0.44        | 0.42  | 0.23  | 0.18  | 0.44 | 0.42  | 0.20          | -0.00 | 0.20 | -0.00 | 0.23  | -0.14 | 0.23 | -0.14 |
| M11             | 0.44        | 0.36  | 0.56 | 0.52  | 0.31  | 0.25  | 0.49        | 0.47  | 0.31  | 0.25  | 0.49 | 0.47  | 0.27          | 0.14  | 0.27 | 0.14  | 0.21  | 0.06  | 0.21 | 0.06  |
| M11-L           | 0.87        | -0.73 | 0.81 | -0.63 | 0.46  | -0.28 | 0.45        | -0.16 | 0.46  | -0.28 | 0.45 | -0.16 | 0.66          | -0.56 | 0.66 | -0.56 | 0.71  | -0.58 | 0.71 | -0.58 |

Table S34: Root mean square (RMS) and mean signed average (MSA) values (in eV) in TDDFT and TDA excitation energies with aug-def2-TZVP basis relative to the CC2 values. “Five States” compares the excitation energies of all five states. “First State” compares the excitation energies of only the lowest excited states. “Relative VEEs” compares the gaps,  $VEE(n)-VEE(0)$ , between different excited states.

| Functional      | Five States |       |      |       |       |       | First State |       |       |       |      |       | Relative VEEs |       |      |       |  |  |
|-----------------|-------------|-------|------|-------|-------|-------|-------------|-------|-------|-------|------|-------|---------------|-------|------|-------|--|--|
|                 | TDDFT       |       | TDA  |       | TDDFT |       | TDA         |       | TDDFT |       | TDA  |       | TDDFT         |       | TDA  |       |  |  |
|                 | RMS         | MSA   | RMS  | MSA   | RMS   | MSA   | RMS         | MSA   | RMS   | MSA   | RMS  | MSA   | RMS           | MSA   | RMS  | MSA   |  |  |
| CIS/RPA         | 0.89        | 0.79  | 0.99 | 0.89  | 0.64  | 0.59  | 0.78        | 0.75  | 0.43  | 0.24  | 0.39 | 0.18  | 0.37          | -0.31 | 0.34 | -0.23 |  |  |
| B3LYP           | 0.37        | -0.31 | 0.34 | -0.23 | 0.26  | -0.15 | 0.32        | -0.01 | 0.33  | -0.20 | 0.45 | -0.28 | 0.42          | 0.35  | 0.49 | 0.44  |  |  |
| BHLYP           | 0.42        | 0.35  | 0.49 | 0.44  | 0.37  | 0.31  | 0.52        | 0.48  | 0.17  | 0.06  | 0.18 | -0.05 | 0.31          | 0.25  | 0.38 | 0.33  |  |  |
| CAM-B3LYP       | 0.31        | 0.25  | 0.38 | 0.33  | 0.26  | 0.20  | 0.41        | 0.38  | 0.12  | 0.06  | 0.14 | -0.06 | 0.20          | 0.16  | 0.07 | 0.16  |  |  |
| CAMh-B3LYP      | 0.16        | 0.07  | 0.23 | 0.16  | 0.18  | 0.12  | 0.34        | 0.29  | 0.15  | -0.06 | 0.24 | -0.16 | 0.12          | 0.07  | 0.16 | 0.16  |  |  |
| BP86            | 0.91        | -0.80 | 0.86 | -0.72 | 0.71  | -0.56 | 0.71        | -0.48 | 0.56  | -0.31 | 0.64 | -0.29 | 0.71          | -0.80 | 0.86 | -0.72 |  |  |
| PBE             | 0.95        | -0.85 | 0.90 | -0.77 | 0.77  | -0.60 | 0.77        | -0.52 | 0.57  | -0.32 | 0.64 | -0.31 | 0.95          | -0.85 | 0.90 | -0.77 |  |  |
| PBE0            | 0.23        | -0.14 | 0.22 | -0.05 | 0.18  | 0.00  | 0.28        | 0.14  | 0.29  | -0.17 | 0.39 | -0.25 | 0.23          | -0.14 | 0.22 | -0.05 |  |  |
| PBE50           | 0.48        | 0.43  | 0.56 | 0.52  | 0.39  | 0.34  | 0.56        | 0.53  | 0.18  | 0.12  | 0.14 | -0.01 | 0.48          | 0.43  | 0.56 | 0.52  |  |  |
| $\omega$ PBE    | 0.48        | 0.40  | 0.55 | 0.49  | 0.23  | 0.20  | 0.41        | 0.40  | 0.31  | 0.25  | 0.23 | 0.12  | 0.48          | 0.40  | 0.55 | 0.49  |  |  |
| $\omega$ hPBE0  | 0.17        | 0.06  | 0.24 | 0.15  | 0.19  | 0.12  | 0.36        | 0.30  | 0.19  | -0.07 | 0.30 | -0.19 | 0.17          | 0.06  | 0.24 | 0.15  |  |  |
| $\omega$ PBEh   | 0.37        | 0.30  | 0.44 | 0.39  | 0.24  | 0.20  | 0.42        | 0.40  | 0.20  | 0.12  | 0.18 | -0.02 | 0.37          | 0.30  | 0.44 | 0.39  |  |  |
| BNL             | 0.70        | 0.63  | 0.78 | 0.73  | 0.46  | 0.38  | 0.61        | 0.57  | 0.36  | 0.32  | 0.27 | 0.20  | 0.70          | 0.63  | 0.78 | 0.73  |  |  |
| $\omega$ B97X   | 0.68        | 0.60  | 0.75 | 0.70  | 0.36  | 0.29  | 0.51        | 0.49  | 0.43  | 0.39  | 0.31 | 0.27  | 0.68          | 0.60  | 0.75 | 0.70  |  |  |
| $\omega$ B97X-D | 0.43        | 0.36  | 0.50 | 0.46  | 0.26  | 0.22  | 0.44        | 0.42  | 0.24  | 0.19  | 0.18 | 0.04  | 0.43          | 0.36  | 0.50 | 0.46  |  |  |
| M06-2X          | 0.26        | 0.17  | 0.33 | 0.26  | 0.23  | 0.18  | 0.39        | 0.35  | 0.13  | -0.00 | 0.20 | -0.11 | 0.26          | 0.17  | 0.33 | 0.26  |  |  |
| M11             | 0.36        | 0.16  | 0.42 | 0.25  | 0.25  | 0.17  | 0.36        | 0.29  | 0.24  | -0.01 | 0.25 | -0.06 | 0.36          | 0.16  | 0.42 | 0.25  |  |  |
| M11-L           | 1.32        | -1.19 | 1.30 | -1.15 | 1.31  | -1.01 | 1.32        | -0.94 | 0.58  | -0.23 | 0.65 | -0.27 | 1.32          | -1.19 | 1.30 | -1.15 |  |  |

**Table S35: Deviation of TDDFT excitation energies (in eV) obtained with def2-TZVP basis sets and mixed basis sets from values obtained using aug-def2-TZVP basis sets. In the mixed basis sets, aug-def2-TZVP basis functions were employed on hydrogen atoms, and def2-TZVP basis functions on non-hydrogen atoms (C, N, O, S).**

| Functional      | def2-TVZP |      |      | Mixed |      |      |
|-----------------|-----------|------|------|-------|------|------|
|                 | RMS       | MSA  | MAX  | RMS   | MSA  | MAX  |
| B3LYP           | 0.54      | 0.38 | 1.28 | 0.11  | 0.05 | 0.34 |
| CAM-B3LYP       | 0.57      | 0.42 | 1.48 | 0.10  | 0.07 | 0.24 |
| CAMh-B3LYP      | 0.58      | 0.42 | 1.44 | 0.10  | 0.07 | 0.23 |
| PBE0            | 0.52      | 0.35 | 1.30 | 0.09  | 0.05 | 0.26 |
| $\omega$ hPBE0  | 0.53      | 0.36 | 1.34 | 0.11  | 0.08 | 0.25 |
| $\omega$ PBEh   | 0.52      | 0.36 | 1.32 | 0.12  | 0.09 | 0.27 |
| $\omega$ B97X-D | 0.47      | 0.32 | 1.23 | 0.13  | 0.09 | 0.28 |
| M06-2X          | 0.69      | 0.51 | 1.74 | 0.10  | 0.07 | 0.20 |

**Table S36: Overlap integrals and VEEs (in eV) for the pVP molecule obtained using TDA and the B3LYP and CAM-B3LYP functionals. The overlap integrals are defined in Eqs. 11 and 12 and are computed between the detachment or attachment densities from a smaller basis set calculation (def2-TZVP or mixed basis sets) with densities obtained from the larger aug-def2-TZVP basis set calculation.**

| Functional | state | def2-TZVP |        |        | mixed |        |        | aug-def2-TZVP |
|------------|-------|-----------|--------|--------|-------|--------|--------|---------------|
|            |       | VEE       | detach | attach | VEE   | detach | attach | VEE           |
| B3LYP      | 1     | 4.58      | 0.9994 | 0.9908 | 4.54  | 0.9999 | 0.9962 | 4.51          |
|            | 2     | 5.02      | 0.9687 | 0.2361 | 4.78  | 0.9999 | 0.9951 | 4.76          |
|            | 3     | 5.60      | 0.9676 | 0.2399 | 4.97  | 0.9997 | 0.9865 | 4.90          |
|            | 4     | 5.98      | 0.8247 | 0.3664 | 5.21  | 0.9999 | 0.9908 | 5.16          |
|            | 5     | 6.21      | 0.9369 | 0.2799 | 5.43  | 0.9999 | 0.9847 | 5.37          |
| CAM-B3LYP  | 1     | 4.84      | 0.9993 | 0.9907 | 4.80  | 0.9998 | 0.9961 | 4.77          |
|            | 2     | 5.25      | 0.9996 | 0.9816 | 5.21  | 0.9999 | 0.9885 | 5.14          |
|            | 3     | 6.19      | 0.9896 | 0.7591 | 5.28  | 0.9998 | 0.9962 | 5.26          |
|            | 4     | 6.59      | 0.8356 | 0.3705 | 5.65  | 0.9999 | 0.9928 | 5.61          |
|            | 5     | 6.85      | 0.8285 | 0.3242 | 5.90  | 0.9999 | 0.9866 | 5.85          |

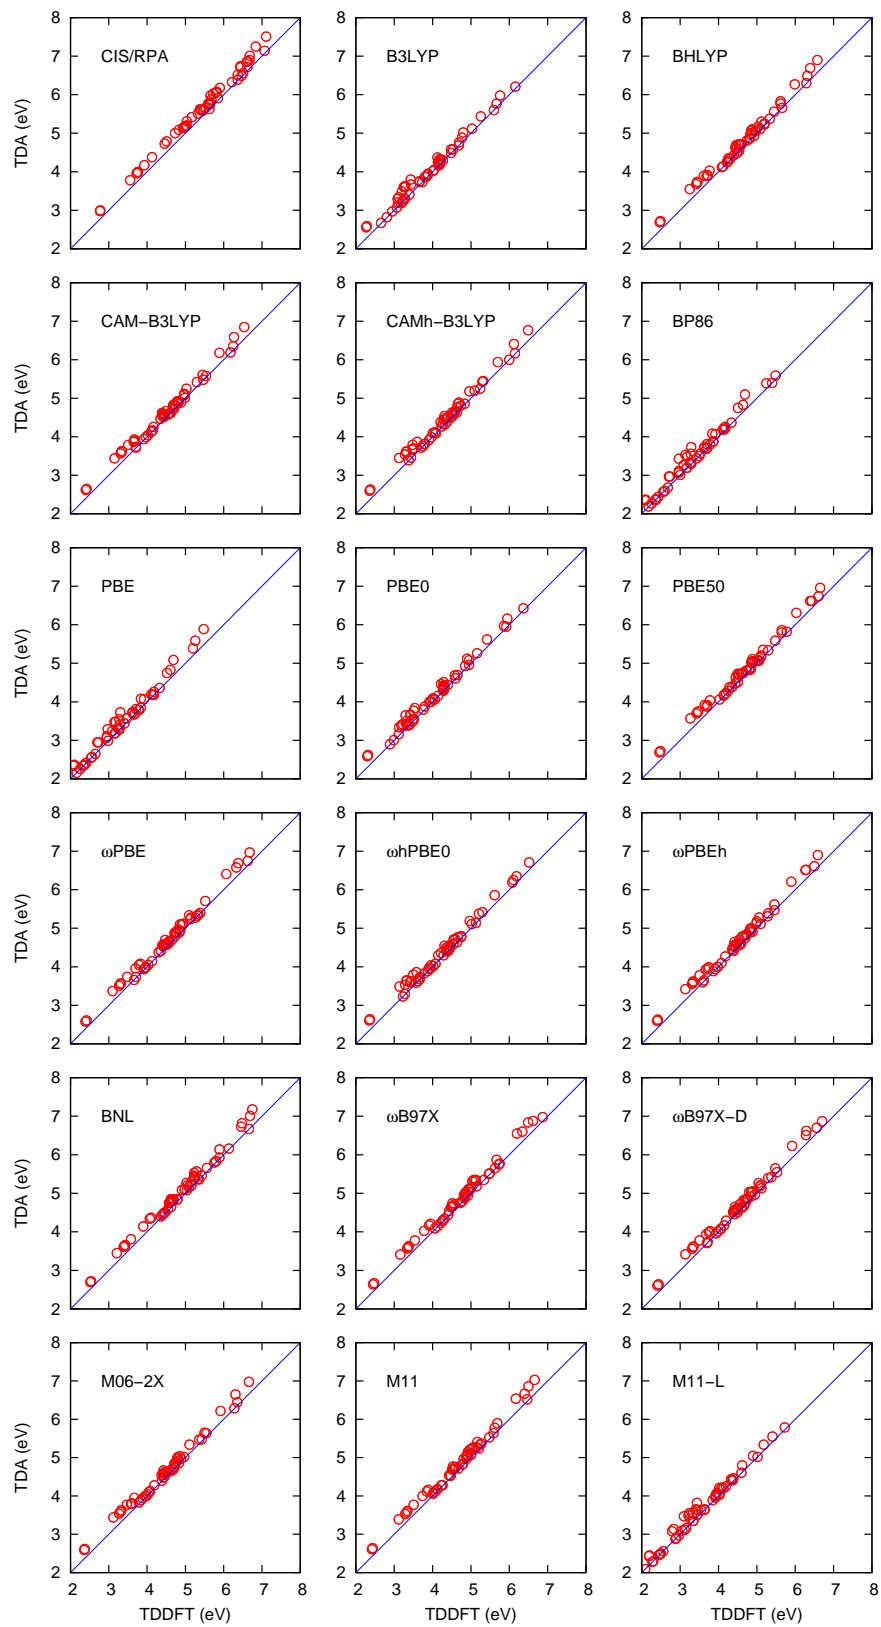

**Figure S1:** The VEEs calculated using the TDA method are compared with the VEEs calculated with TDDFT using def2-TZVP basis sets.



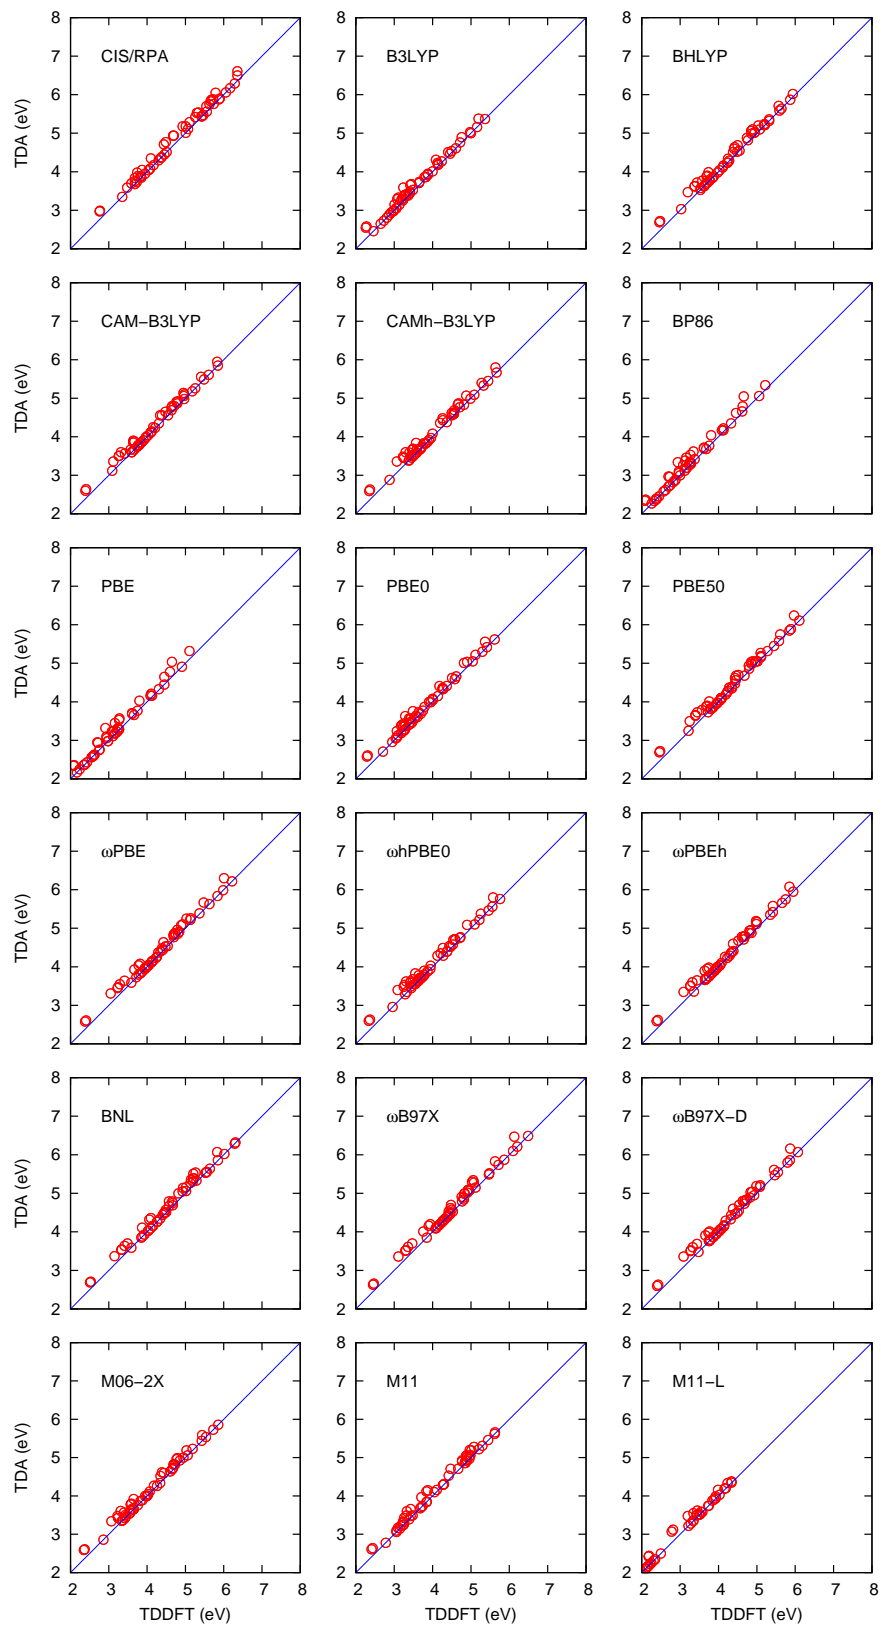

**Figure S2:** The VEEs calculated using the TDA method are compared with the VEEs calculated with TDDFT using aug-def2-TZVP basis sets.

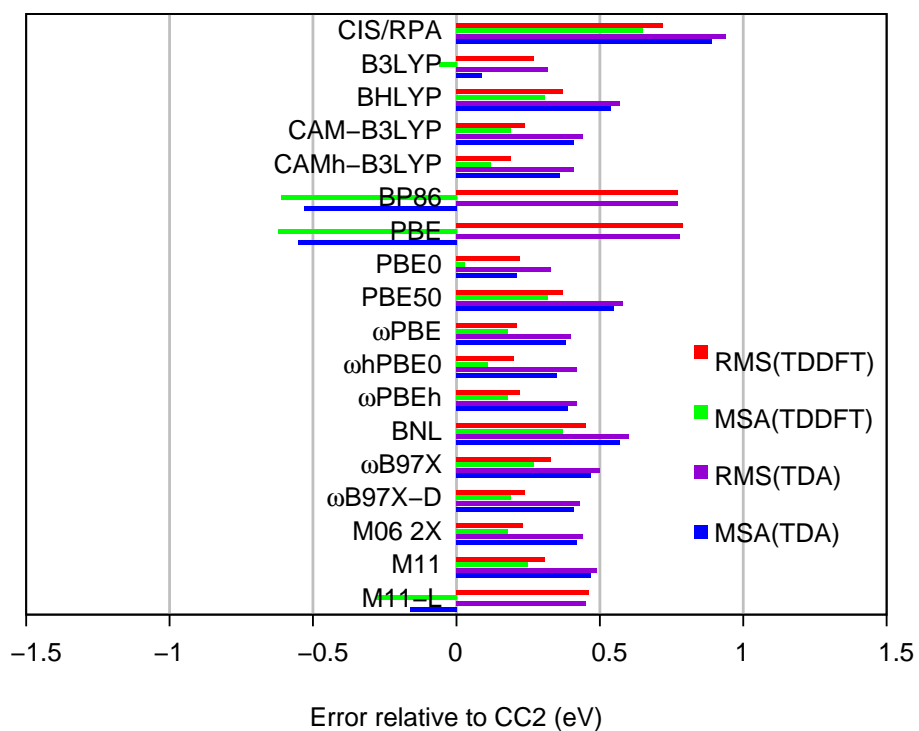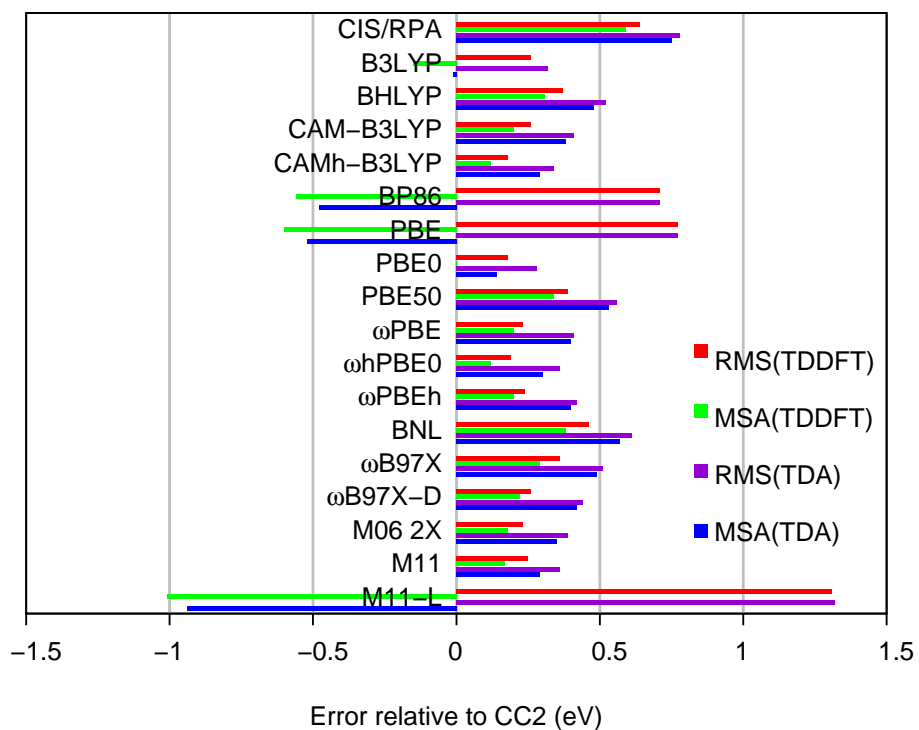

**Figure S3:** Root-mean-square (RMS) and mean signed average (MSA) values (in eV) of the lowest VEEs of the 11 chromophores calculated at the TDDFT and TDA levels as compared with the VEEs calculated at the CC2 level using def2-TZVP basis set sets (top panel) and aug-def2-TZVP basis set sets (bottom panel).

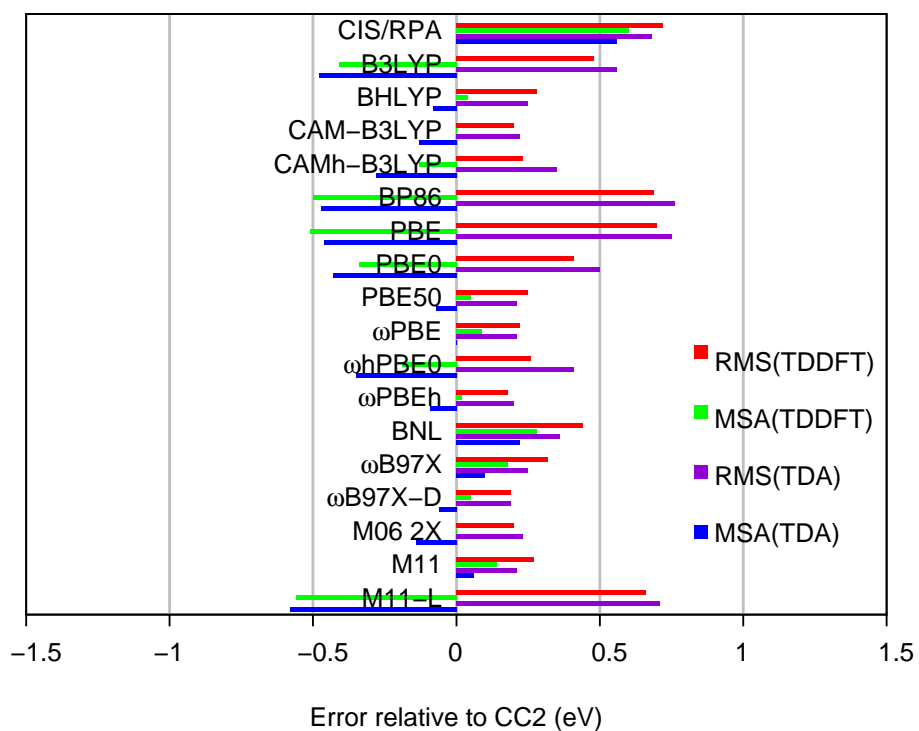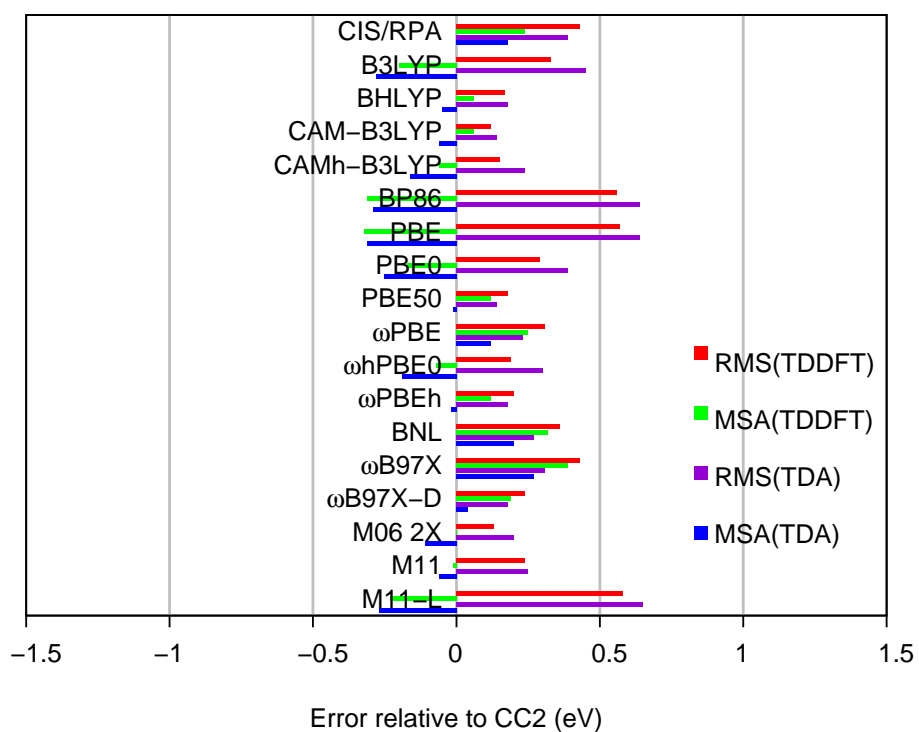

**Figure S4:** Root-mean-square (RMS) and mean signed average (MSA) values (in eV) of the 5 lowest VEEs calculated at the TDDFT and TDA levels as compared with the VEEs calculated at the CC2 level using def2-TZVP basis set sets (top panel) and aug-def2-TZVP basis set sets (bottom panel).
